1           **Top-down control of hippocampal signal-to-noise by**  
2                           **prefrontal long-range inhibition**

3                           Ruchi Malik, Yi Li, Selin Schamiloglu, and Vikaas S. Sohal\*

4    *Department of Psychiatry, UCSF Weill Institute for Neurosciences, Kavli Institute for*  
5    *Fundamental Neuroscience, Center for Integrative Neuroscience, University of California San*  
6    *Francisco, San Francisco, California*

7    \* Corresponding author: [vikaas.sohal@ucsf.edu](mailto:vikaas.sohal@ucsf.edu)

## 8 **Summary**

9 The prefrontal cortex (PFC) is postulated to exert ‘top-down control’ by modulating information  
10 processing throughout the brain to promote specific actions based on current goals. However, the  
11 pathways mediating top-down control remain poorly understood. In particular, knowledge about  
12 direct prefrontal connections that might facilitate top-down prefrontal control of information  
13 processing in the hippocampus remains sparse. Here we describe novel monosynaptic long-range  
14 GABAergic projections from PFC to hippocampus. These preferentially inhibit vasoactive  
15 intestinal polypeptide expressing interneurons, which are known to disinhibit hippocampal  
16 microcircuits. Indeed, stimulating prefrontal–hippocampal GABAergic projections increases  
17 hippocampal feedforward inhibition and reduces hippocampal activity *in vivo*. The net effect of  
18 these actions is to specifically enhance the signal-to-noise ratio for hippocampal representations  
19 of objects. Correspondingly, stimulation of PFC-to-hippocampus GABAergic projections  
20 promotes object exploration. Together, these results elucidate a novel top-down pathway in  
21 which long-range GABAergic projections target disinhibitory microcircuits, thereby enhancing  
22 signals and network dynamics underlying exploratory behavior.

## 23 **Introduction**

24 The prefrontal cortex (PFC) plays a crucial role in executive functions and the top-down control  
25 of brain activity and behavior (Gazzaley and D'Esposito, 2007; Miller and Cohen, 2001; Miller,  
26 2000). It is postulated that PFC bidirectionally communicates with several cortical and  
27 subcortical brain regions, monitoring and gating their ongoing activity, in order to exert top-  
28 down executive control over behavior. One brain region that is known to bidirectionally interact  
29 with the PFC is the hippocampus (HPC), a key brain region for processing spatial information,  
30 and using spatial representations to guide behavior. Accumulating evidence in humans and  
31 animal models highlights an essential role of network interactions between the PFC and HPC in  
32 cognitive and emotional behaviors (Eichenbaum, 2017; Jin and Maren, 2015; Preston and  
33 Eichenbaum, 2013; Shin and Jadhav, 2016; Sigurdsson and Duvarci, 2016; Yu and Frank, 2015).  
34 Importantly, abnormal PFC-HPC interactions are thought to contribute to cognitive and  
35 emotional deficits in several neuropsychiatric disorders, including schizophrenia, depression, and  
36 anxiety disorders (Cunniff et al., 2020; Godsil et al., 2013; Kupferschmidt and Gordon, 2018; Li  
37 et al., 2015; Sigurdsson et al., 2010). Owing to the importance of PFC-HPC interactions in  
38 normal and pathological behaviors, much work has been focused on elucidating how these  
39 regions interact.

40 Functional imaging studies in humans as well as rodent studies using lesions and  
41 pharmacological inactivation have shown that concurrent activity in, and communication  
42 between, the PFC and HPC is essential for spatial exploratory behaviors (Bähner et al., 2015;  
43 Churchwell et al., 2010; DeVito and Eichenbaum, 2010; Floresco et al., 1997; Wang and Cai,  
44 2006; Yoon et al., 2008). Neural activity and network oscillations synchronize across the PFC  
45 and HPC during spatial exploratory behaviors (Colgin, 2011; Jones and Wilson, 2005; O'Neill et  
46 al., 2013; Spellman et al., 2015). In particular, oscillatory activity in HPC leads PFC activity  
47 when rats explore spatial contexts, but this pattern of synchronization switches to PFC leading  
48 when rats explore objects in their environment (Place et al., 2016) or arrive at decision points in  
49 a maze (Hallock et al., 2016). Furthermore, inactivating the PFC alters the encoding of spatial  
50 information in the HPC (Guise and Shapiro, 2017; Kyd and Bilkey, 2003). These findings  
51 suggest that the PFC exerts top-down control over HPC activity at key behavioral timepoints, but  
52 knowledge about direct anatomical projections that mediate this kind of top-down prefrontal  
53 control is lacking. In fact, whereas much is known about the direct anatomical pathways from the  
54 HPC-to-PFC (Hoover and Vertes, 2007; Jay and Witter, 1991), most top-down communication  
55 in the PFC-to-HPC direction is thought to occur indirectly, via the thalamic nucleus reuniens  
56 (NR) (Hoover and Vertes, 2012; Vertes et al., 2007; Xu and Südhof, 2013). Not only are the  
57 anatomical substrates for top down control unknown, the manner in which top down control

58 operates is also unclear. I.e., does the PFC exerts top-down control by transmitting specific  
59 information, e.g., representations of specific actions or goals, or alternatively, does it modulate  
60 the network state, changing the nature of emergent circuit computations in downstream regions?

61 Previous studies of PFC-HPC interactions have focused on direct and indirect excitatory  
62 (glutamatergic) connections between these structures. Growing evidence indicates that cortical  
63 circuits also include specialized populations of long-range projecting GABAergic (LRG)  
64 inhibitory neurons (Jinno et al., 2007; Melzer and Monyer, 2020; Tamamaki and Tomioka,  
65 2010). In some cases, these LRG projections have been shown to control oscillatory  
66 synchronization between structures (Christenson Wick et al., 2019; Francavilla et al., 2018;  
67 Melzer et al., 2012), suggesting that they may be important regulators of interregional  
68 communication. We recently reported that the PFC also contains specialized LRG projection  
69 neurons capable of influencing behavior (Lee et al., 2014). Therefore, we hypothesized that a  
70 specialized population of PFC LRG projection neurons might serve as the anatomical substrate  
71 through which the PFC exerts top-down control over hippocampal information processing.

72 Here, we report a novel population of LRG neurons in the PFC that send direct inhibitory  
73 projections to the dorsal hippocampus (dHPC). Notably, these prefrontal LRG projections target  
74 local disinhibitory microcircuits and modulate network oscillations in dHPC. Through these  
75 actions, PFC–dHPC LRG projections promote network states associated with object exploration,  
76 enhance hippocampal representations of object locations, and elicit corresponding increases in  
77 the time mice spend exploring objects. Together, our results show how the PFC exerts top-down  
78 control over information processing in the HPC by acting through a novel circuit motif: long-  
79 range GABAergic projections which inhibit disinhibitory microcircuits, thereby altering  
80 emergent network dynamics and promoting specific exploratory behaviors.

## 81 Results

### 82 Hippocampus projecting long-range GABAergic (LRG) neurons in the PFC

83 To label potential PFC-to-HPC LRG projections, we used *Dlxi12b-Cre* mice, which specifically  
84 express Cre recombinase in GABAergic neurons (Lee et al., 2014; Potter et al., 2009). We  
85 injected an adeno-associated virus (AAV) to drive Cre-dependent expression of the fluorescent  
86 reporter eYFP (AAV5-EF1 $\alpha$ -DIO-eYFP) in the PFC of *Dlxi12b-Cre* mice (Fig. 1A). After  
87 waiting 6–8 weeks for viral transduction, we observed robust eYFP expression in the cell bodies  
88 of GABAergic neurons in the PFC and also observed many axonal fibers in the CA1 and dentate  
89 gyrus subfields of dHPC (Fig. 1B and Fig. S1). Importantly, no eYFP<sup>+</sup> cell bodies were  
90 observed in the HPC.

91 Next, we asked whether these PFC LRG axon terminals synapse onto neurons in the  
92 dHPC. To address this, we injected AAV into the PFC of *Dlxi12b-Cre* mice to drive Cre-  
93 dependent expression of Channelrhodopsin-eYFP (ChR2-eYFP) in PFC GABAergic neurons,  
94 then, after waiting for expression, made recordings from acute hippocampal slices (Fig. 1C).  
95 Notably, optogenetic activation of PFC LRG axonal fibers in dHPC slices elicited robust short-  
96 latency postsynaptic currents (oPSCs) in dHPC neurons. These currents reversed at the GABA  
97 reversal potential, were not affected by glutamatergic receptor antagonists, and were completely  
98 blocked by bath application of the GABA<sub>A</sub> receptor antagonist gabazine (10  $\mu$ M) (Fig. 1D).

99 Following the identification of PFC–dHPC LRG projections, we asked whether these  
100 dHPC-projecting PFC LRG neurons have distinct electrophysiological and molecular properties,  
101 and whether these neurons are located in superficial or deeper cortical layers of the PFC. To  
102 address these questions, we used an intersectional strategy to selectively express ChR2-eYFP in  
103 dHPC-projecting PFC LRG neurons. Specifically, we injected two viruses: a retrogradely  
104 transducing canine adenovirus type-2 Cre (CAV2-Cre) into dHPC, and a Cre-dependent AAV  
105 expressing ChR2-eYFP under control of the *Dlxi12b* enhancer into PFC (Lee et al., 2014) (Fig.  
106 1E, F). We then made *ex-vivo* patch clamp recordings from dHPC-projecting LRG neurons in  
107 PFC (identified by eYFP expression), and recorded reliable short-latency light-evoked action  
108 potentials (APs) to confirm that they were ChR2-expressing (Fig. 1G). These recordings revealed  
109 that the dHPC-projecting PFC LRG neuronal population is electrophysiologically diverse,  
110 comprising neurons with regular spiking (9/16 neurons), irregular spiking (3/16 neurons), and  
111 fast spiking (4/16 neurons) physiological properties (Fig. 1H and Table S1). dHPC-projecting  
112 PFC LRG neurons were distributed across superficial and deeper layers of the prelimbic (PL)  
113 portion of the PFC. By combining injection of a retrograde tracer (Alexa 594-tagged cholera  
114 toxin, CTb) in dHPC with immunohistochemistry in PFC (Fig. S2A, B), we found that dHPC-  
115 projecting PFC LRG neurons include parvalbumin (PV), somatostatin (SST), and vasoactive

116 intestinal polypeptide (VIP)-expressing subpopulations (Fig. S2C, D). We also observed small  
117 percentages of calretinin (CR) and neuropeptide-Y (NPY) expressing PFC–dHPC LRG neurons.  
118 However, none of the PFC LRG neurons in our study showed immunoreactivity for neuronal  
119 nitric oxide synthase (nNOS). Taken together, these results reveal that the dHPC receives direct  
120 LRG projections which originate from a heterogeneous population of GABAergic inhibitory  
121 neurons located across multiple layers of the PFC.

122

### 123 **PFC LRG projections target hippocampal disinhibitory interneurons**

124 Next, we asked how electrophysiologically and molecularly heterogeneous PFC LRG projection  
125 neurons affect circuit computations in the CA1 subregion, which is the primary output region of  
126 the dHPC. Specifically, we asked whether PFC LRG projections target specific cell-types in the  
127 CA1 subregion. We expressed Chr2-eYFP in PFC LRG projections and obtained *ex-vivo* patch  
128 clamp recordings from excitatory pyramidal neurons and GABAergic interneurons located in  
129 different topographical layers of CA1 subregion in acute hippocampal slices (Fig. 2A).  
130 Interestingly, we observed robust optogenetically-evoked IPSCs in CA1 interneurons (55/70  
131 connected, henceforth referred to as recipient interneurons), but not in CA1 pyramidal neurons  
132 (PNs; 0/38 connected) (details of interneuron and PN classification in Methods). Notably, many  
133 of the recipient CA1 interneurons were located near the border between stratum radiatum (SR)  
134 and stratum lacunosum-moleculare (SLM) (Fig. 2B). Furthermore, recipient CA1 interneurons  
135 comprised physiologically heterogeneous subtypes including regular spiking, irregular spiking,  
136 and fast spiking interneurons (Fig. 2B and Table S2). In order to determine whether the PFC  
137 LRG projections target molecularly defined interneuron subtypes in CA1, we filled a subset of  
138 the recipient interneurons with biocytin and quantified the immunoreactivity for three molecular  
139 markers commonly expressed in CA1 interneurons– PV, SST, and VIP. Surprisingly, we found  
140 that a majority of recipient interneurons expressed VIP (7/11). By contrast, none of the recipient  
141 interneurons we examined expressed PV or SST (0/10) (Fig. 2C).

142

### 143 **PFC LRG projections regulate excitatory input integration in CA1 microcircuit**

144 Since VIP is predominantly expressed by interneuron-selective interneurons (ISIs) which  
145 produce circuit disinhibition in CA1 (Acsády et al., 1996a; 1996b; Chamberland and Topolnik,  
146 2012; Turi et al., 2019), we hypothesized that PFC–dHPC LRG projections may inhibit VIP+  
147 ISIs, thereby reducing disinhibition and increasing feedforward inhibition in the CA1  
148 microcircuit. To test this prediction, we quantified the effect of optogenetic stimulation of PFC  
149 LRG projections on excitatory and inhibitory postsynaptic potentials (EPSPs and IPSPs) elicited  
150 by two major afferent input pathways: Schaffer collateral (SC) and temporoammonic (TA) inputs  
151 (Fig. 2D). Specifically, during *ex-vivo* patch clamp recordings from CA1 PNs, we delivered

152 electrical stimulation to SC or TA inputs concomitant with optogenetic stimulation of Chr2+  
153 PFC–dHPC LRG axon fibers. While the optogenetic stimulation of PFC–dHPC LRG axons  
154 alone did not elicit discernable postsynaptic potentials in CA1 PNs, concomitant electrical and  
155 optogenetic stimulation significantly increased the size of IPSPs relative to EPSPs for both SC  
156 and TA inputs (Fig. 2E, F and Fig. S3A, B). This reduction in the excitation to inhibition ratio  
157 (E/I ratio) for SC and TA inputs is consistent with our prediction and suggests that the PFC LRG  
158 projections increase feedforward inhibition by inhibiting disinhibitory VIP+ interneurons in  
159 CA1.

160 We then asked whether increased feedforward inhibition during stimulation of PFC LRG  
161 projections affects the input-output transformation performed by CA1 PNs. Coincident activation  
162 of SC and TA input pathways, often in a theta-burst stimulation (TBS) pattern, is known to cause  
163 supralinear input summation and spiking in CA1 PNs (Ang et al., 2005; Bittner et al., 2015;  
164 Malik and Johnston, 2017). This nonlinear input integration and coincidence detection in CA1  
165 PNs is tightly regulated by the activity of CA1 interneurons and considered crucial for  
166 hippocampal information processing (Grienberger et al., 2017; Milstein et al., 2015). To  
167 determine how PFC–dHPC LRG projections modulate input integration in CA1 PNs, we  
168 combined electrical TBS of SC and TA inputs with optogenetic stimulation of PFC–dHPC LRG  
169 projections (20 Hz, 5 ms pulses) (Fig. 2G). Again, consistent with increased feedforward  
170 inhibition, optogenetic stimulation of LRG projections reduced firing and EPSP summation  
171 during TBS (Fig. 2H). Importantly, firing of CA1 PNs in response to depolarizing current  
172 injections (i.e., neuronal depolarization without recruitment of microcircuit inhibition) was not  
173 affected by optogenetic stimulation of these PFC LRG projections (Fig. S3C). Taken together,  
174 our *ex-vivo* electrophysiological analyses show how PFC–dHPC LRG projections regulate  
175 synaptic integration and input-output gain by enhancing feedforward inhibition onto CA1 PNs  
176 (Fig. S3D).

177

### 178 **PFC–dHPC LRG projections promote object exploration**

179 Communication between PFC and HPC is implicated in many spatial and object exploration  
180 behaviors (DeVito and Eichenbaum, 2010; Jin and Maren, 2015; Preston and Eichenbaum, 2013;  
181 Spellman et al., 2015; Yu and Frank, 2015). Notably, both structures synchronize at theta  
182 frequency with dHPC leading when rodents enter a spatial context, but the directionality  
183 switches to PFC leading when animals sample an object (Place et al., 2016). This suggests an  
184 important role for top-down communication from PFC to dHPC during object exploration.  
185 Therefore, we quantified how PFC–dHPC LRG projections affect object exploration in freely  
186 behaving mice. Optogenetic stimulation of PFC–dHPC LRG projections (20 Hz, 5 ms pulses,  
187 473 nm, ~3-4 mW) dramatically increased the time *Dlx1/2-Cre* mice spent engaged in novel



188 object exploration (NOE) (Fig. 3A, B). Light delivery alone had no effect in control (Cre-  
189 negative) mice. Increases in NOE occurred during both early and late portions of the testing  
190 session (Fig. 3C, D), and reflected increased numbers of both short- and long-duration bouts of  
191 object exploration (Fig. 3E). Optogenetic stimulation of PFC–dHPC LRG projections did not  
192 affect the distance travelled in an open field, time spent on the stimulated side during a real-time  
193 place preference task, or the time spent exploring a novel juvenile mouse (Fig. S4A–C). Thus,  
194 activating PFC–dHPC LRG projections specifically increases NOE without nonspecifically  
195 affecting movement or other exploratory behaviors.

196

### 197 **PFC LRG projections promote network oscillations associated with object exploration**

198 Next, we explored potential circuit mechanisms through which PFC–dHPC LRG projections  
199 might impact NOE. We did this in two ways. First, we recorded local field potentials (LFPs) to  
200 determine whether stimulation of PFC–dHPC LRG projections might induce network states  
201 conducive to NOE (Fig. 4A). In comparison to baseline home cage (HC) exploration, NOE  
202 recruited synchronized oscillations in the low-gamma (25–55 Hz) band across the PFC–dHPC  
203 network. Specifically, during NOE we observed a significant increase in low-gamma power in  
204 both structures as well as an increase in low-gamma phase synchrony between the PFC and  
205 dHPC (Fig. 4B). While the increase in low-gamma activity was most prominent, NOE was also  
206 associated with significant increases in power (but not synchrony) for high-gamma activity (both  
207 structures) and theta activity (dHPC only) (Fig. S5A, B). The NOE related change in low-gamma  
208 frequency oscillations is particularly notable because previous studies have shown that object  
209 exploration increases low-gamma synchrony between hippocampal subfields (Trimper et al.,  
210 2017). Since microcircuit interactions between local CA1 interneurons and PNs are known to  
211 critically regulate gamma oscillations (Csicsvari et al., 2003; Tukker et al., 2007), we  
212 hypothesized that by modulating microcircuit inhibition, PFC–dHPC LRG projections could  
213 contribute to NOE-associated changes in gamma activity. To test whether PFC–dHPC LRG  
214 projections might support these changes in network activity, we combined optogenetic  
215 stimulation with multisite LFP recordings in *Dlx1/2b-Cre* mice expressing ChR2 in PFC–dHPC  
216 LRG projections (Fig. 4C). Indeed, optogenetic stimulation of PFC LRG terminals (20 Hz, 5 ms  
217 pulses, 473 nm, ~3–4 mW) in dHPC mimicked the increases in both low-gamma LFP power and  
218 low-gamma phase synchrony observed during NOE (Fig. 4D and Fig. S5C, D). Thus, PFC LRG  
219 projections promote a network state associated with object exploration, a behavior known to rely  
220 on top-down PFC–dHPC communication.

221

### 222 **PFC–dHPC LRG projections reduce hippocampal activity *in vivo***



223 Having established that PFC–dHPC LRG projections promote network states associated with  
224 NOE as well as NOE itself, we next studied how these projections affect NOE-associated  
225 hippocampal activity at the level of single cells. For this, we expressed jRCaMP7f in dHPC CA1  
226 neurons (Dana et al., 2019) and used one-photon miniaturized microscopes (miniscopes) to  
227 record *in vivo* neuronal  $Ca^{2+}$  activity while mice explored novel objects. Concurrently, we  
228 expressed the red-shifted excitatory opsin ChrimsonR (Klapoetke et al., 2014; Stamatakis et al.,  
229 2018) in PFC–dHPC LRG projections (Fig. 5A–C and Fig. S6A, B). On day 1, mice explored a  
230 novel object in the absence of optogenetic stimulation of PFC LRG projections. Across all  
231 neurons,  $Ca^{2+}$  activity decreased significantly during NOE, relative to the HC epoch (Fig. 5D),  
232 although a small fraction of neurons (13/55 neurons) had higher activity during NOE (Fig. S6C).  
233 On day 2, we optogenetically stimulated PFC–dHPC LRG projections during both HC and NOE  
234 epochs. Stimulating LRG projections during the HC epoch significantly reduced activity  
235 (compared to the pre-stimulation HC period). Activity was then further reduced when the mice  
236 subsequently engaged in NOE (Fig. 5D and Fig. S6C). This overall reduction in population  
237 activity *in vivo* is consistent with our *ex-vivo* observation that activating PFC–dHPC LRG  
238 projections tends to enhance feedforward inhibition and reduce spiking in CA1 PNs.

239

#### 240 **PFC–dHPC LRG projections enhance the encoding of objects by hippocampal ensembles**

241 To assess whether these global changes in CA1 activity were associated with changes in how the  
242 hippocampus encodes NOE-relevant information, we compared the NOE-driven changes in  
243 neuronal activity on day 1 (no stimulation) vs. day 2 (LRG stimulation). As shown by the  
244 seminal discovery of place cells, dHPC CA1 neurons encode information by preferentially firing  
245 in specific spatial locations (Moser et al., 2008; O'Keefe, 1976; Wilson and McNaughton, 1993).  
246 Therefore, we asked whether the PFC–dHPC LRG projections affect the encoding of object  
247 location by individual hippocampal neurons. Specifically, for each neuron, we defined its ‘object  
248 signal-to-noise ratio’ (Object\_SNR) as the change in its activity within a zone surrounding the  
249 object location before vs. after introducing the object (activity was z-scored relative to the mean  
250 and standard deviation outside the object zone) (Fig. 6A). Based on this metric, neurons that  
251 increased or decreased activity in the object zone by one standard deviation had Object\_SNR of  
252 1 or -1, respectively. During light stimulation, the activity of neurons decreased both within and  
253 outside of the object zone; the standard deviations of neuronal activity also decreased (Fig. 6B).  
254 Depending on exactly how these changes were distributed across neurons, Object\_SNR values  
255 could potentially increase, decrease, or remain unchanged. In fact, we observed that stimulating  
256 PFC LRG projections significantly increased Object\_SNR values relative to the no light  
257 condition (Fig. 6B, right-most panel). Notably, light delivery alone did not affect the neuronal  
258 activity or the Object\_SNR in control (opsin-negative) mice (Fig. 6C). Furthermore, in opsin-

259 expressing mice, LRG stimulation did not affect an analogous ‘SNR’ calculated for a control  
260 zone on the opposite side of the cage (instead of the object zone) (Fig. 6D, E). Thus, even though  
261 PFC–dHPC LRG projections potentiate feedforward inhibition and reduce overall network  
262 activity, their net effect on hippocampal encoding is to specifically enhance object-driven signals  
263 in individual CA1 neurons.

## 264 **Discussion**

265 Interactions between the PFC and HPC have been implicated in numerous aspects of cognition  
266 and emotion, including decisions about whether to engage in exploratory behaviors. While  
267 monosynaptic excitatory projections from the ventral HPC are believed to transmit specific  
268 information, e.g., the locations of goals, to the PFC (Spellman et al., 2015; Wang and Cai, 2006),  
269 pathways through which the PFC exerts top-down control over the HPC, and the exact nature of  
270 these top-down effects, have remained less well understood. Here, we describe a novel  
271 monosynaptic projection from the PFC-to-dHPC. There are many unusual features of this  
272 projection: it is GABAergic and targets hippocampal VIP+ ISIs, thus representing a ‘doubly  
273 disinhibitory’ long-range motif. We show that this projection modulates microcircuit dynamics  
274 in the CA1 region of dHPC, increasing feedforward inhibition, reducing spiking evoked by  
275 afferent inputs, and enhancing low-gamma activity that is synchronized between the PFC and  
276 dHPC. Furthermore, we show that activation of these projections reduces *in vivo* activity while  
277 specifically enhancing the representations of objects in the dorsal CA1. Lastly, in accord with the  
278 postulated role of PFC as a top-down controller, we found that the activation of these LRG  
279 projections drives object exploration behavior in mice. Overall, our study shows that these top-  
280 down prefrontal projections can dynamically control the network state and emergent circuit  
281 function in the dHPC, thereby altering the signal-to-noise ratio for specific neural representations  
282 and eliciting corresponding changes in behavior. This answers long-standing questions about the  
283 mechanisms and nature of top-down control in the limbic system.

284

### 285 **Relationship to previous work**

286 Multiple lines of evidence in humans, non-human primates, and rodents have suggested that PFC  
287 can exert top-down control over information processing in the HPC, particularly during  
288 behaviors involving spatial and object exploration (Brincat and Miller, 2015; Eichenbaum, 2017;  
289 Jin and Maren, 2015; Place et al., 2016; Preston and Eichenbaum, 2013; Shin and Jadhav, 2016;  
290 Sigurdsson and Duvarci, 2016; Yu and Frank, 2015). Importantly, previous studies have shown  
291 that lesion and pharmacological inactivation of PFC severely impairs spatial navigation and  
292 object exploratory behaviors, and also disrupts neuronal encoding in the HPC (Churchwell et al.,  
293 2010; DeVito and Eichenbaum, 2010; Floresco et al., 1997; Guise and Shapiro, 2017; Kyd and  
294 Bilkey, 2003; Wang and Cai, 2006; Yoon et al., 2008). Nevertheless basic aspects of this process  
295 have remained elusive. Specifically, the pathways mediating prefrontal top-down control have  
296 not been identified, and it was not known whether the PFC acts by transmitting specific  
297 information to the HPC vs. by modulating the network state and emergent circuit function.  
298 Addressing these questions is crucially important, because interactions between the HPC and

299 PFC have been implicated in so many behaviors and disorders, and because the role of the PFC  
300 in top-down control is largely taken for granted despite the paucity of knowledge about specific  
301 mechanisms. Our study addresses this major gap by revealing a novel anatomical substrate  
302 mediating prefrontal top-down control, and showing exactly how it regulates behavior via  
303 actions on hippocampal neurons, microcircuits, network dynamics, and information processing.

304 Our anterograde tracing experiments showed that the PFC LRG projections are  
305 concentrated in the dorsal HPC, relative to the intermediate and ventral parts portions of HPC.  
306 By contrast, the NR, which is known to mediate indirect PFC–HPC communication,  
307 preferentially innervates the intermediate and ventral HPC (Hoover and Vertes, 2012). This  
308 suggests that conjunctive information transfer via the direct PFC LRG pathway and the indirect  
309 PFC→NR→HPC pathway would allow PFC to orchestrate activity along the entire extent of the  
310 hippocampal dorsoventral axis. Interestingly, the hippocampal dorsoventral axis is functionally  
311 segregated with the dorsal HPC being crucially involved in spatial processing and the ventral  
312 HPC regulating emotions, fear, and anxiety (Fanselow and Dong, 2010). Therefore, an alternate  
313 possibility is that the direct PFC→dHPC LRG projections and indirect PFC→NR→ventral HPC  
314 projections may mediate fundamentally distinct aspects of top-down control over cognitive vs.  
315 emotional behaviors, respectively. Similar to the functional segregation along the hippocampal  
316 dorsoventral axis, the PFC can also be subdivided dorsoventrally, into functionally specialized  
317 subregions, e.g., anterior cingulate (ACC), prelimbic (PL), and infralimbic (IL) cortices. We  
318 found PFC–dHPC LRG projections originating from PL. Notably, the ACC also sends direct  
319 projections to the dHPC (Rajasekharan et al., 2015). However, by targeting excitatory neurons  
320 in the CA3 subregion of the HPC, these previously described ACC–CA3 excitatory projections  
321 primarily regulate the retrieval of fear memories. While the role of ACC–CA3 projections in  
322 spatial exploratory behaviors has not been investigated, it is plausible that the direct projections  
323 originating from ACC and PL regions transmit parallel streams of information from the PFC to  
324 alter hippocampal activity during distinct behaviors. Future work will be necessary to elucidate  
325 how glutamatergic vs. GABAergic top-down projections originating from different regions of the  
326 PFC, and targeting different portions of the HPC potentially interact and/or complement each  
327 other.

328 Our study shows that PFC–dHPC LRG projections target inhibitory interneurons, but not  
329 excitatory pyramidal neurons, within the CA1 subregion. This preferential targeting of inhibitory  
330 interneurons is similar to what has been observed in previous studies of cortical LRG inputs to  
331 the HPC. Specifically, the entorhinal cortex, which is the primary interface between the HPC and  
332 the neocortex, sends LRG projections which target local interneurons in the HPC (Basu et al.,  
333 2016; Melzer et al., 2012). However, in contrast to effect we observed, whereby PFC–dHPC  
334 LRG projections increase feedforward inhibition by inhibiting VIP interneurons, entorhinal LRG

335 projections primarily act to reduce hippocampal feedforward inhibition. This raises the  
336 possibility that feedforward inhibition may be a convergent pathway on which many LRG inputs  
337 act to regulate hippocampal information processing. Feedforward inhibition represents an  
338 attractive target, as it crucially regulates input-output gain, neuronal plasticity, and information  
339 encoding in hippocampal pyramidal neurons (Grienberger et al., 2017; McKenzie, 2018).

340 VIP interneurons in the HPC are a specialized class which disinhibit other GABAergic  
341 interneurons, thereby tending to promote increases in microcircuit activity. Accordingly,  
342 disinhibition mediated by hippocampal VIP interneurons has been implicated in gain control,  
343 memory, selective attention, and goal-directed behaviors (Cunha-Reis and Caulino-Rocha, 2020;  
344 Turi et al., 2019). While we found that the CA1 interneurons which receive PFC–dHPC LRG  
345 inputs are electrophysiologically heterogeneous but tend to express VIP, understanding whether  
346 their axons target specific inhibitory loci within the CA1 microcircuit will help us to further  
347 understand the detailed nature of their actions. This is important because VIP+ interneurons in  
348 the CA1 subregion constitute electrophysiologically and morphologically diverse subtypes  
349 (Acsády et al., 1996a; 1996b; Chamberland and Topolnik, 2012). Prior work has also shown that  
350 specialized subpopulations of hippocampal VIP+ GABAergic neurons send long-range  
351 projections which innervate different parts of the hippocampal formation, and are recruited  
352 during specific oscillatory states (Francavilla et al., 2018). It is possible that PFC–dHPC LRG  
353 projections target these long-range projecting VIP neurons, contributing to their state-dependent  
354 patterns of activity, and helping to produce some of the changes in network dynamics we  
355 observed here. Alternatively, the changes in hippocampal low-gamma oscillations we observed  
356 could be result from increases in feedforward inhibition.

357

### 358 **Relationship to disease**

359 Many neuropsychiatric disorders – including autism, schizophrenia, depression, and anxiety  
360 disorders – are proposed to involve deficits in prefrontal functions and top-down control (Gilbert  
361 et al., 2008; Hare and Duman, 2020; Orellana and Slachevsky, 2013), and in particular, altered  
362 connectivity and communication between PFC and HPC (Cunniff et al., 2020; Godsil et al.,  
363 2013; Kupferschmidt and Gordon, 2018; Li et al., 2015; Sigurdsson et al., 2010). Abnormalities  
364 in GABAergic neuron structure and function have also been heavily implicated in the  
365 pathophysiology of neuropsychiatric disorders (Chattopadhyaya and Cristo, 2012; Marin, 2012;  
366 Paterno et al., 2020). PFC–dHPC LRG projections obviously represent a point of convergence  
367 for these different mechanisms. Thus, abnormalities in PFC–dHPC LRG projections could  
368 plausibly contribute to the disruptions in network oscillations, top-down control, and PFC–dHPC  
369 communication that occur in a variety of disease states.

370

371 **Conclusion**

372 In summary, our study describes a novel anatomical pathway which plays a key role in direct  
373 PFC-to-HPC communication. The unique features of these projections (i.e., long-range  
374 GABAergic, disinhibitory interneuron targeting) enable PFC to dynamically alter emergent  
375 network activity and information processing in the HPC, and thereby exert top-down control  
376 over exploratory behavior.

377 **Acknowledgements**

378 We thank M. Sharma and H. Seifikar for technical support. We are grateful to L. Frank, M.  
379 Kheirbek, and members of the Sohal laboratory for comments on earlier versions of this  
380 manuscript. This work was supported by National Institute of Mental Health (R01MH106507  
381 and RO1MH117961 to V.S.S.) and 2018 NARSAD Young Investigator Grant from Brain &  
382 Behavior Research Foundation (Leichtung Family investigator, R.M.). Confocal images were  
383 acquired at the Nikon Imaging Center at the University of California San Francisco.

384

385 **Author contributions**

386 R.M. and V.S.S. designed the experiments and analyses. R.M. performed all experiments and  
387 analyzed the data, except that R.M. and Y.L. performed immunohistochemistry. S.S. generated  
388 pilot histology data for anterograde tracing experiments. R.M. and V.S.S. wrote the manuscript.

389

390 **Competing interests**

391 The authors declare no competing interests.



## MAIN FIGURES AND LEGENDS

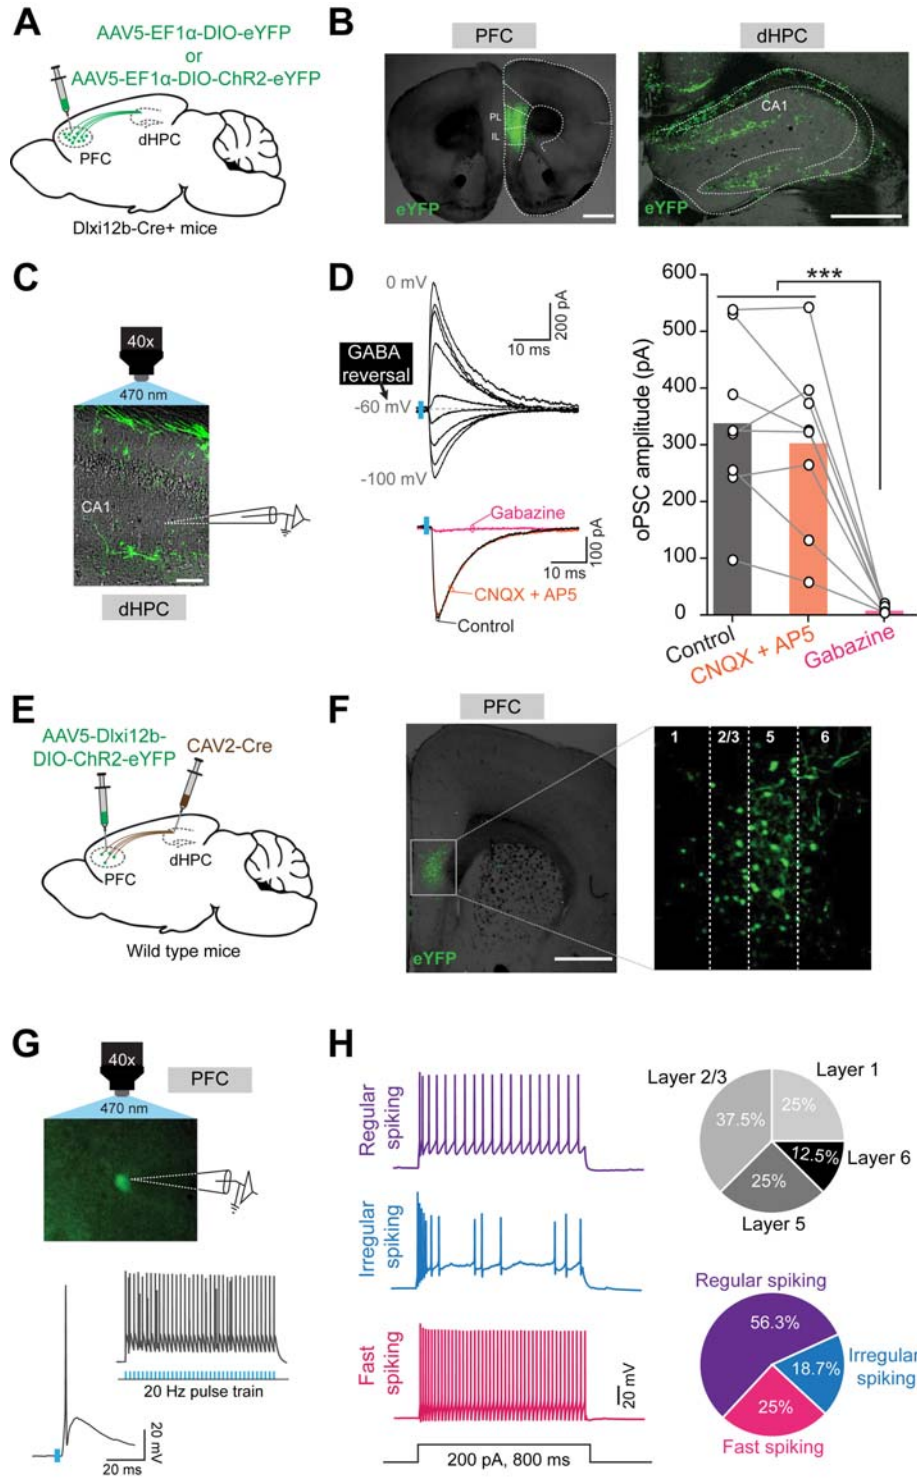

392 **Figure 1: A heterogeneous population of PFC inhibitory neurons sends direct LRG**  
393 **projections to the dHPC.**

394 (A) Schematic illustrating the anterograde tracing strategy. Cre-dependent eYFP or ChR2-eYFP  
395 virus was injected into the PFC of *Dlx12b-Cre*<sup>+</sup> mice.

396 (B) Representative images showing eYFP<sup>+</sup> PFC GABAergic neurons (left) and eYFP<sup>+</sup> axonal  
397 fibers in the dHPC (right). Scale bars, 1 mm and 0.5 mm, respectively. Prelimbic cortex (PL),  
398 infralimbic cortex (IL), and hippocampal CA1 regions are labeled.

399 (C) Overlaid fluorescent and DIC images of a hippocampal section showing ChR2-eYFP<sup>+</sup>  
400 axonal fibers (green) in dorsal CA1. During *ex-vivo* patch clamp recordings from hippocampal  
401 neurons, ChR2<sup>+</sup> LRG axons were optogenetically activated by pulses of blue light (5 ms, 470  
402 nm) delivered through the 40x objective. Scale bar, 100  $\mu$ m.

403 (D) Top left: example traces showing that optogenetically evoked postsynaptic currents (oPSCs)  
404 in recipient CA1 neurons reverse at the GABA reversal potential (gray dashed line). Blue bars  
405 denote light pulses. Bottom left: example oPSCs recorded from a CA1 neuron in control aCSF  
406 (black), after adding CNQX + AP5 (orange), and after adding Gabazine (magenta). Right: oPSC  
407 amplitudes were significantly reduced by Gabazine. Open circles represent data from individual  
408 neurons (n = 8) and bars represent averages; one-way ANOVA followed by Tukey's multiple  
409 comparison test, \*\*\* p < 0.001.

410 (E) Schematic demonstrating the intersectional strategy to target dHPC-projecting PFC LRG  
411 neurons. Retrogradely transducing canine adenovirus type-2 Cre (CAV2-Cre) was injected into  
412 dHPC, and a Cre-dependent AAV that drives expression of ChR2-eYFP using a GABAergic  
413 neuron-specific enhancer (*Dlx12b*) was injected into PFC.

414 (F) Representative images showing ChR2-eYFP expression in dHPC projecting GABAergic  
415 neurons in PFC. White dotted box in the left image corresponds to the magnified image shown in  
416 right. Numbers indicate the cortical layers. Scale bar, 1 mm.

417 (G) Top: representative image showing *ex-vivo* patch clamp recording obtained from ChR2-  
418 eYFP expressing PFC–dHPC LRG neuron. Bottom: example traces showing PFC–dHPC LRG  
419 neuron firing elicited in response to a single light pulse (5 ms, 470 nm) or a 20 Hz train.

420 (H) Left: example voltage responses of PFC–dHPC LRG neurons to depolarizing current  
421 injections. Top right: pie chart showing the laminar distribution of recorded PFC–dHPC LRG  
422 neurons. Bottom right: pie chart showing the percentage of PFC–dHPC LRG neurons with  
423 various physiological properties.

424 See also **Figures S1, S2** and **Table S1**.

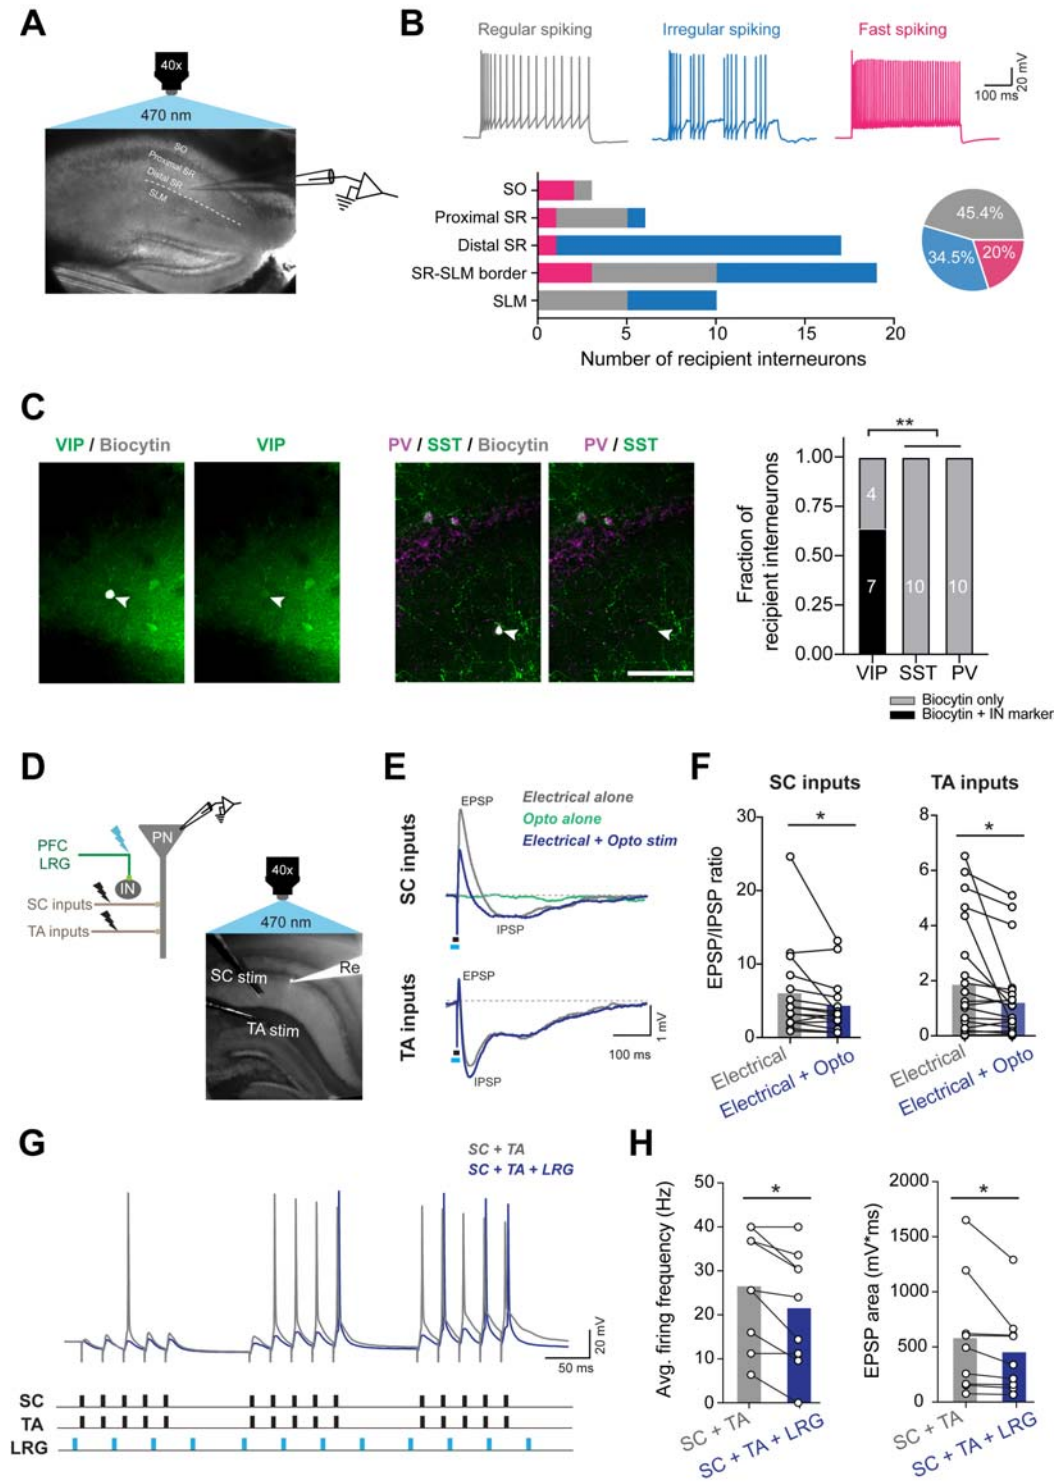

425 **Figure 2: PFC LRG projections preferentially target interneuron-selective interneurons**  
 426 **(ISIs) and increase feedforward inhibition in the CA1 microcircuit.**

427 (A) Example DIC image of a hippocampal slice showing *ex-vivo* patch clamp recording from a  
 428 CA1 neuron during optogenetic stimulation of PFC LRG projections. Different layers of CA1 are

429 labeled; stratum oriens (SO), stratum radiatum (SR), and stratum lacunosum-pyramidale (SLM);  
430 dashed white line represents the border between SR and SLM.

431 **(B)** Top: example voltage responses to depolarizing current injections for CA1 neurons which  
432 receive input from PFC LRG projections. Regular spiking (gray), irregular spiking (blue), and  
433 fast spiking properties (magenta) are observed among recipient CA1 neurons. Bottom left:  
434 number of recipient interneurons with fast spiking, regular spiking and irregular spiking  
435 physiology at different laminar locations in CA1 is plotted. Bottom right: pie chart showing the  
436 percentage of recipient CA1 neurons with regular spiking (25/55), irregular spiking (19/55), and  
437 fast spiking (11/55) properties.

438 **(C)** Left: Representative images showing staining for inhibitory neuron (IN) markers (VIP, PV  
439 or SST) in recipient CA1 neurons filled with biocytin. Scale bar, 100  $\mu\text{m}$ . Right: fraction of  
440 recipient neurons which stained positive for VIP or (in separate sections) for PV or SST. More  
441 recipient neurons stained positive for VIP vs. PV or SST (Chi-square test,  $** p < 0.01$ ).

442 **(D)** Top left: Schematic showing the experimental configuration. Right: example hippocampal  
443 image showing Alexa-594 filled recording electrode (Re) targeting a CA1 pyramidal neuron  
444 (PN). Stimulating electrodes were placed in SR and SLM to stimulate Schaffer collateral (SC  
445 stim) or temporoammonic (TA stim) inputs, respectively. Brief pulses of blue light (5ms, 470  
446 nm) delivered through the 40x objective were used to optogenetically stimulate PFC LRG  
447 projections.

448 **(E)** Excitatory and inhibitory postsynaptic potentials (EPSPs and IPSPs) elicited by electrical  
449 stimulation of SC or TA inputs (black bar) in the presence or absence of optogenetic stimulation  
450 of PFC-dHPC LRG projections (cyan bar). Gray traces show responses to electrical stimulation  
451 alone, blue traces show responses during combined electrical + optogenetic stimulation, and  
452 green trace shows response to optogenetic stimulation alone.

453 **(F)** Right: optogenetic stimulation of PFC-dHPC LRG projections significantly decreased EPSP  
454 to IPSP ratios for both SC ( $n = 15$  cells) and TA ( $n = 22$  cells) inputs. Lines connect values from  
455 individual neurons and bars represent averages; two-way paired t-test,  $** p < 0.01$ ,  $* p < 0.05$ .

456 **(G)** Example voltage responses of CA1 PN to coincident theta-burst stimulation (TBS) of SC  
457 and TA inputs (black bars) combined with 20 Hz optogenetic stimulation of PFC LRG  
458 projections (cyan bars). Gray trace shows voltage response to SC and TA electrical stimulation,  
459 and blue trace denotes response during SC and TA electrical stimulation + optogenetic  
460 stimulation of PFC LRG projections.

461 **(H)** Average firing frequency (left) and EPSP area (right) during TBS of SC and TA inputs are  
462 reduced by concomitant optogenetic stimulation of PFC LRG projections. Open circles represent  
463 individual neurons ( $n = 9$ ) and bars represent averages; two-way paired t-test,  $* p < 0.05$ .

464 See also **Figure S3** and **Table S2**.



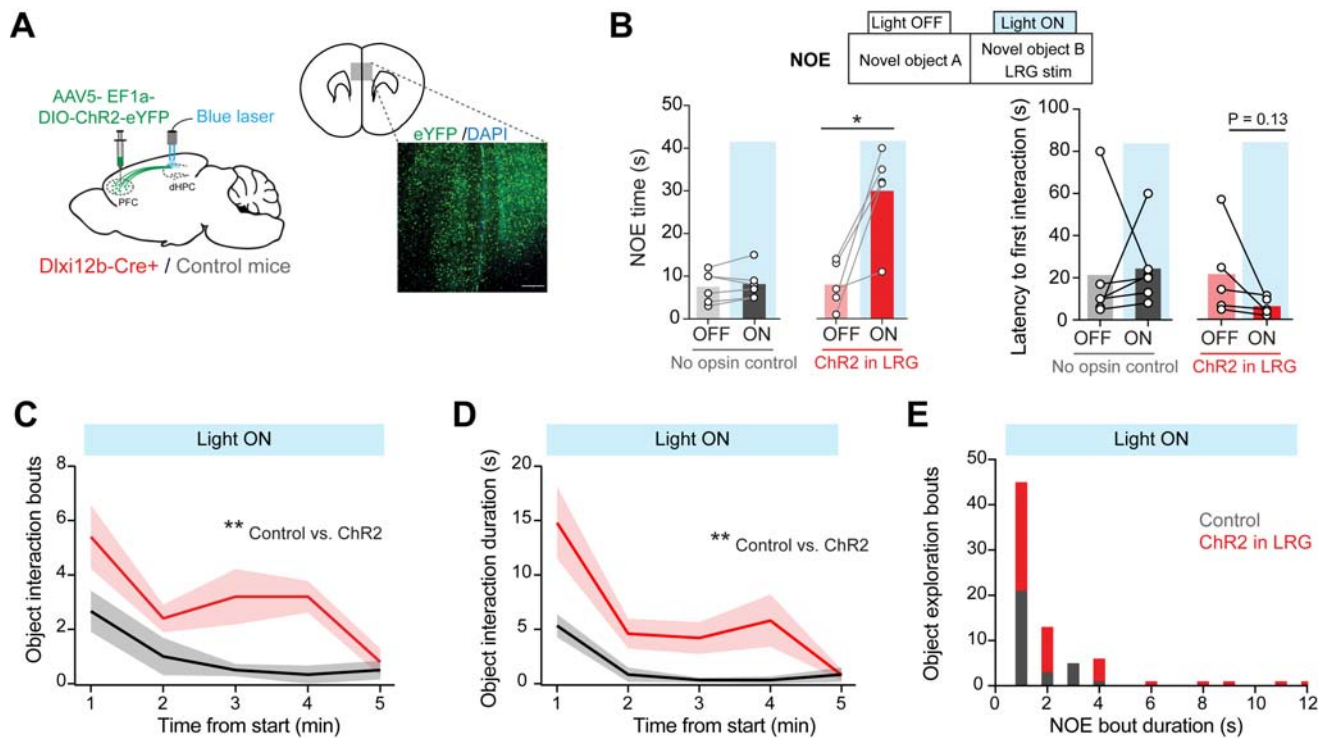

465 **Figure 3: Activating PFC–dHPC LRG projections increases novel object exploration.**

466 (A) Left: schematic illustrating the experimental design. Bilateral injections of Cre-dependent  
 467 ChR2-eYFP virus into the PFC of *Dlx12b-Cre+* mice or *Cre-negative* (control) mice. Bilateral  
 468 optical fibers were implanted over dHPC. Right: representative image showing ChR2-eYFP  
 469 expression in PFC GABAergic neurons. Scale bar, 200µm.

470 (B) Top: novel object exploration (NOE) was measured in the presence (Light ON) or absence  
 471 (Light OFF) of optogenetic stimulation (473nm, 1.5–2 mW/fiber, 5 ms pulses at 20 Hz). Bottom  
 472 left: optogenetic stimulation significantly increased NOE time in ChR2+ mice (n = 5) but not in  
 473 control mice (n = 6). Bottom right: Latency to first interaction with a novel object for ChR2+ and  
 474 control mice is plotted. Open circles represent values from individual mice and bars indicate  
 475 averages. Two-way paired t-test, \*  $p < 0.05$ .

476 (C–D) Number of object interaction bouts within 1-minute bins (C), and duration of object  
 477 interaction within 1-minute bins (D), over the duration of a 5-minute NOE testing session. Two-  
 478 way repeated measures ANOVA, \*\*  $p < 0.01$ .

479 (E) Distribution of NOE bout durations during optogenetic stimulation of PFC LRG projections  
 480 in control and ChR2-expressing mice.

481 See also **Figure S4**.

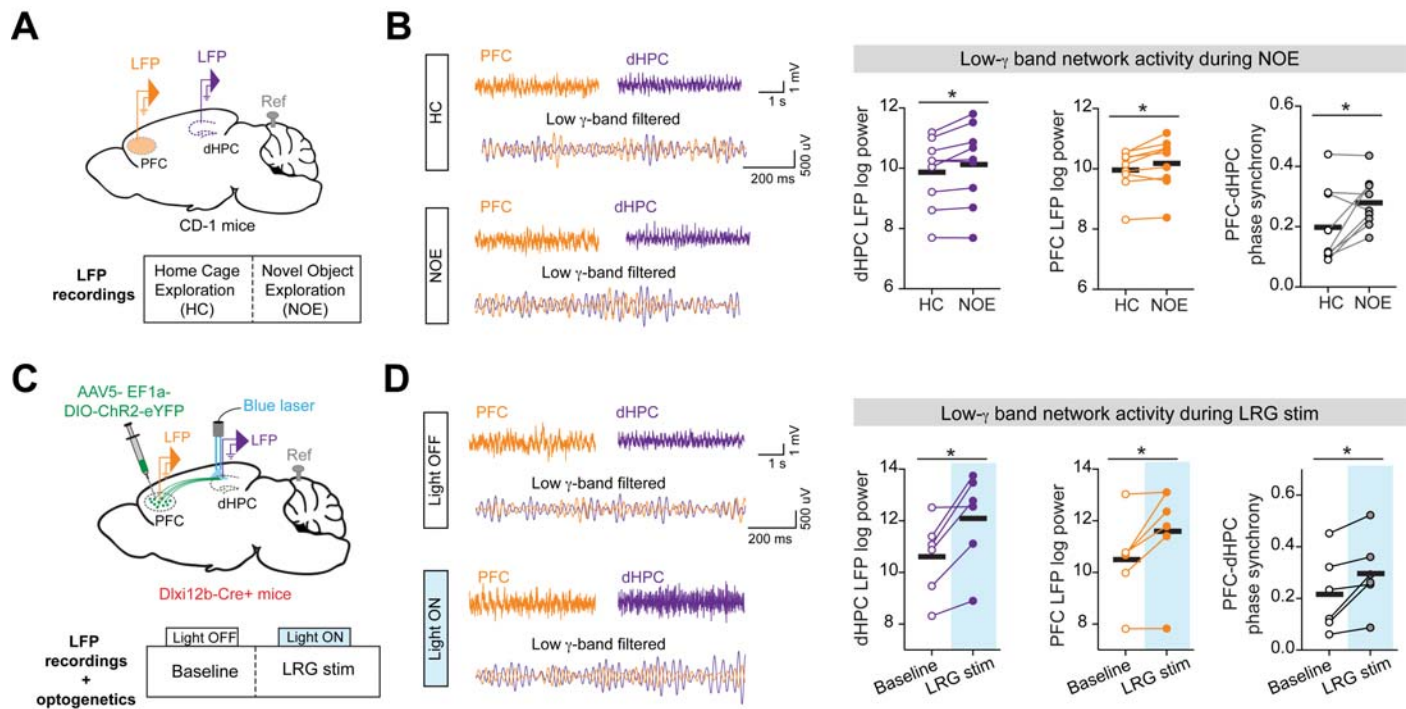

482 **Figure 4: Activating PFC–dHPC LRG projections increases low-gamma oscillations**  
 483 **associated with NOE.**

484 (A) Top: LFP electrodes were implanted in PFC and dHPC, reference electrode was implanted  
 485 over the cerebellum. Bottom: LFPs recorded while mice were in their home cages (HC) were  
 486 compared to LFPs recorded during NOE epochs.

487 (B) Left: example raw and low-gamma (low- $\gamma$ ) frequency filtered LFPs recorded during HC and  
 488 NOE epochs are shown. Right: low- $\gamma$  power in dHPC and PFC and low- $\gamma$  phase synchrony  
 489 between PFC and dHPC were all significantly higher during NOE. Open and filled circles  
 490 represent data from individual mice ( $n = 9$ ) and solid black lines represent averages. Two-way  
 491 paired t-test, \*  $p < 0.05$ .

492 (C) Top: Schematic illustrating the experimental design for combined optogenetic stimulation  
 493 and LFP recordings. Cre-dependent ChR2-eYFP virus was bilaterally injected into the PFC of  
 494 *Dlx12b-Cre+* mice. Bilateral optical fibers were implanted over dHPC; LFP electrodes were  
 495 implanted in PFC and dHPC; reference electrode was implanted over the cerebellum. Bottom:  
 496 LFPs were recorded during baseline epochs (Light OFF) or LRG stimulation epoch (Light ON;  
 497 473 nm, 5 ms pulses at 20 Hz).

498 (D) Left: example raw and low- $\gamma$  band filtered LFPs recorded during Light OFF and Light ON  
 499 epochs. Right: low- $\gamma$  power in dHPC and PFC and low- $\gamma$  phase synchrony between PFC and  
 500 dHPC were all significantly higher during LRG stim (Light ON) epoch. Open and filled circles  
 501 represent data from individual mice ( $n = 6$ ) and solid black lines represent averages. Two-way  
 502 paired t-test, \*  $p < 0.05$ .

503 See also **Figure S5**.

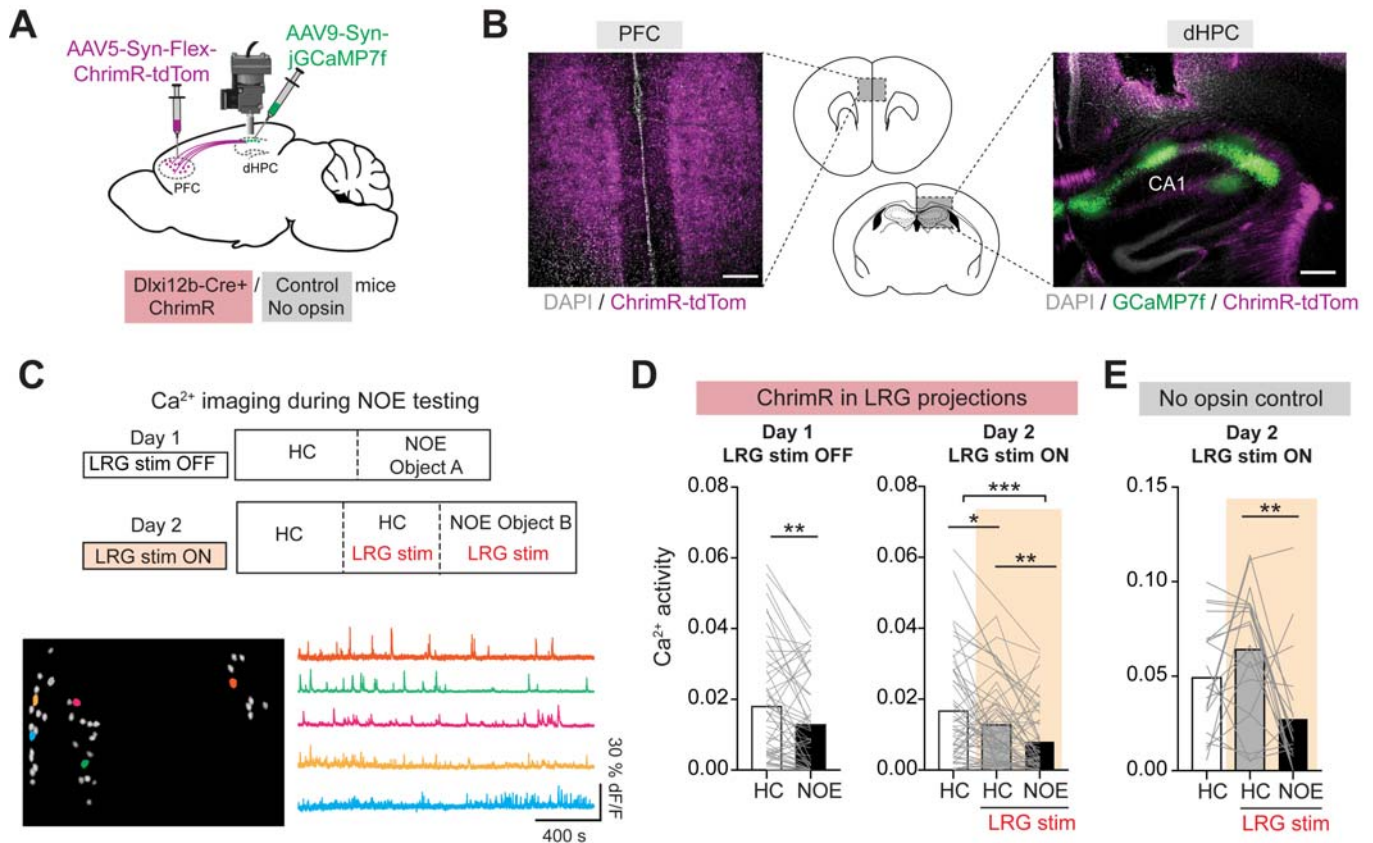

504 **Figure 5: PFC–dHPC LRG projections shape CA1 neuronal activity during object**  
 505 **exploration.**

506 (A) Strategy for *in vivo* Ca<sup>2+</sup> imaging and optogenetic stimulation. Cre-dependent ChrimsonR-  
 507 tdTomato (ChrimR-tdTom) virus was injected into the PFC of *Dlx12b-Cre+* and *Cre-negative*  
 508 (control) mice; jGCaMP7f virus was injected into dorsal CA1, and Ca<sup>2+</sup> activity was imaged  
 509 through an implanted GRIN lens connected to a miniscope.

510 (B) Left: DAPI stained coronal section showing ChrimR-tdTom expression in PFC GABAergic  
 511 neurons. Right: DAPI stained dHPC section showing jGCaMP7f expression in CA1 neurons and  
 512 ChrimR-tdTom expression in PFC–dHPC LRG axonal fibers. Scale bars, 0.5 mm.

513 (C) Top: on day 1, CA1 Ca<sup>2+</sup> activity was measured during home cage (HC) and NOE epochs.  
 514 On day 2, following an initial period of imaging in HC without optogenetic stimulation, Ca<sup>2+</sup>  
 515 imaging was combined with optogenetic stimulation of PFC–dHPC LRG projections (590–650  
 516 nm, ~2 mW, 5 ms pulses at 20 Hz) during HC and NOE epochs. Bottom left: regions of interest  
 517 (ROIs) corresponding to neurons from a representative Ca<sup>2+</sup> imaging session. Bottom right:  
 518 extracted dF/F Ca<sup>2+</sup> transients from example dorsal CA1 neurons. Colors of the traces on the  
 519 right correspond to the colored ROIs on the left.

520 (D) Left: Ca<sup>2+</sup> activity in CA1 neurons was significantly reduced during NOE. Each gray line  
 521 represents a single neuron and bars represent the mean (n = 55 neurons from 2 mice); two-way



522 paired t-test. Right: During the HC epoch on day 2, optogenetic stimulation of PFC–dHPC LRG  
523 projections reduced CA1 Ca<sup>2+</sup> activity. On Day 2, activity was then further reduced during NOE  
524 (n = 59 neurons, 2 mice). One-way ANOVA followed by Tukey’s multiple comparison test; \*\*\*  
525 p < 0.001, \*\* p < 0.01, \* p < 0.05.  
526 **(E)** Same as **D** for control (opsin-negative) mice. Light delivery alone did not affect Ca<sup>2+</sup>  
527 activity. One-way ANOVA followed by Tukey’s multiple comparison test; \*\* p < 0.01.  
528 See also **Figure S6**.

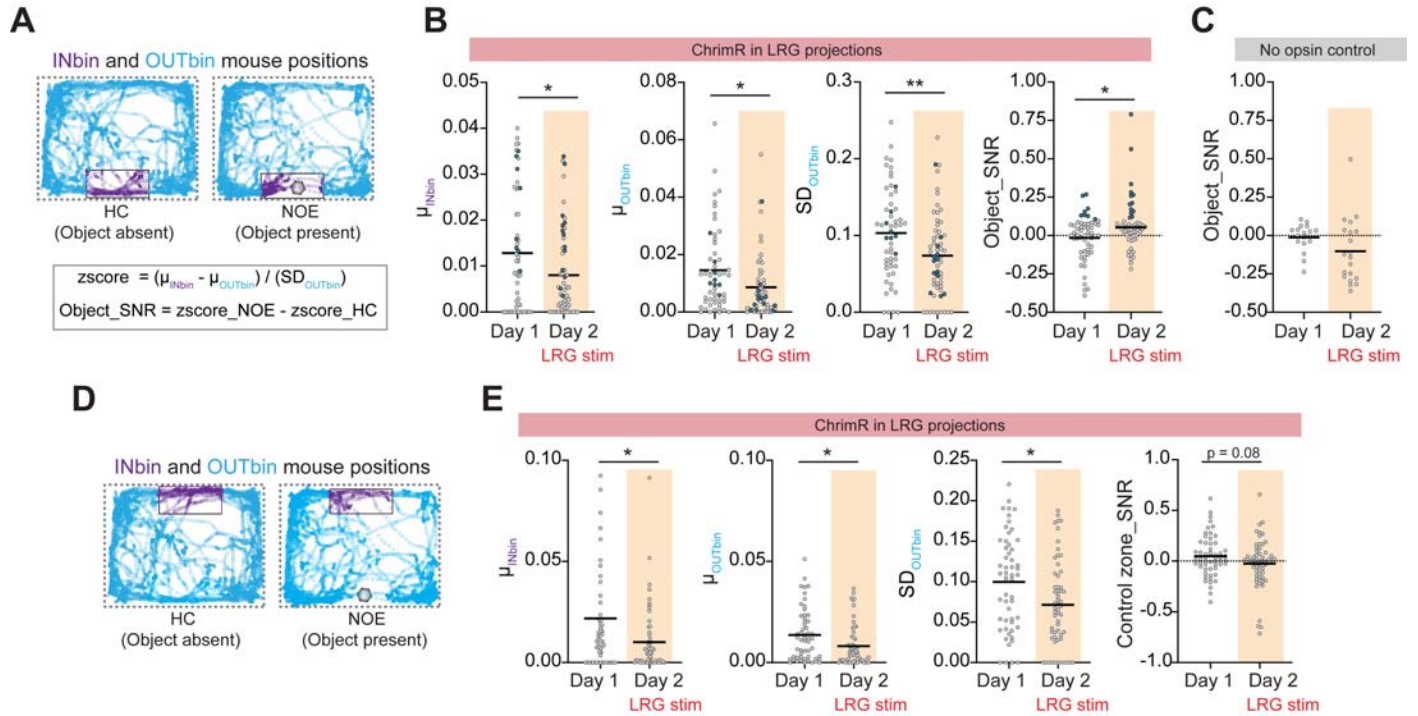

529 **Figure 6: PFC–dHPC LRG projections increase neuronal signal-to-noise ratio for**  
 530 **representation of object location in CA1.**

531 (A) Top: Frame-by-frame mouse positions during HC (left) and NOE (right) epochs are plotted.  
 532 Example data from day 2 recording session is shown. Blue circles denote frames where mouse  
 533 was outside the object zone (‘OUTbin’). Purple circles denote frames where mouse was in the  
 534 object zone (‘INbin’). Gray shaded hexagon indicates the location of the novel object during  
 535 NOE epoch and rectangle with black solid lines denotes the object zone. Bottom: z-scored  $Ca^{2+}$   
 536 activity was calculated as the difference between the mean  $Ca^{2+}$  activity when mouse was within  
 537 ( $\mu_{INbin}$ ) vs. outside ( $\mu_{OUTbin}$ ) the object zone, divided by the standard deviation of activity outside  
 538 the object zone ( $SD_{OUTbin}$ ). The difference in z-scored  $Ca^{2+}$  activity between HC to NOE epochs  
 539 was used to compute Object\_SNR.

540 (B) Optogenetic stimulation of PFC–dHPC LRG projections significantly reduced  $\mu_{INbin}$ ,  $\mu_{OUTbin}$ ,  
 541 and  $SD_{OUTbin}$ . Object\_SNR was increased on day 2 compared to day 1 in opsin-expressing mice.  
 542 Empty gray circles represent from individual neurons and horizontal black lines show means.  
 543 Filled blue circles indicate neurons exceeding an arbitrary threshold for Object\_SNR (>0.1) to  
 544 illustrate  $\mu_{INbin}$ ,  $\mu_{OUTbin}$ , and  $SD_{OUTbin}$  for these high-SNR neurons. Two-way unpaired t-test; \*\* p  
 545 < 0.01, \* p < 0.05.

546 (C) Object\_SNR in control (opsin negative) mice was not affected by light delivery.

547 (D) Frame-by-frame mouse positions during HC (left) and NOE (right) epochs are plotted.  
 548 Example data from day 2 recording session is shown. Blue circles denote frames where mouse  
 549 was away from a control zone (‘OUTbin’) that was the mirror image of the object zone, but on

550 the opposite side of the cage. Purple circles denote frames where mouse was in the control zone  
551 ('INbin'). Gray shaded hexagon denotes the novel object location in NOE epoch and rectangle  
552 with black solid lines denotes the control zone.  
553 (E) For the control zone, optogenetic stimulation of PFC–dHPC LRG projections significantly  
554 reduced  $\mu_{\text{INbin}}$ ,  $\mu_{\text{OUTbin}}$ , and  $\text{SD}_{\text{OUTbin}}$  (similar to the object zone). However, SNR computed for  
555 the control zone was not affected by optogenetic stimulation of LRG projections (in contrast to  
556 the object zone). Empty gray circles represent values from individual neurons and black lines  
557 represent mean values. Two-way unpaired t-test; \*  $p < 0.05$ .

## 558 **METHODS**

### 559 **Animals**

560 All animal care procedures and experiments were conducted in accordance with the National  
561 Institutes of Health guidelines and approved by the Administrative Panels on Laboratory Animal  
562 Care at the University of California, San Francisco. Mice were housed in a temperature-  
563 controlled environment (22–24 °C) with ad libitum access to food and water. Mice were reared  
564 in normal lighting conditions (12-h light/dark cycle). Adult mice from the following lines were  
565 used: *Dlxi12b-Cre* (Potter et al., 2009) and wild-type CD-1.

566

### 567 **Virus and retrograde tracer injections**

568 Mice were anesthetized with isoflurane and placed on a stereotaxic frame (David Kopf  
569 Instruments). An incision was made to expose the skull, and bregma and lambda were used as  
570 references to align the skull. Body temperature was maintained using a heating pad. Virus was  
571 injected (at the rate of 100 nl/min) with a microinjection syringe (Nanofil 10 µl with 35 gauge  
572 needle, World Precision Instruments) connected to a microsyringe pump (World Precision  
573 Instruments, UMP3 UltraMicroPump). Coordinates for injections into PFC were (in mm, relative  
574 to Bregma) 1.8 anterior-posterior (AP), ±0.3 mediolateral (ML), -2.4 dorsoventral (DV); and  
575 coordinates for injections into dHPC were -1.35 AP, ±0.65 ML, -1.5 DV.

576 For anterograde tracing, Chr2 assisted circuit-mapping and optogenetic stimulation  
577 experiments, either AAV5-EF1α-DIO-eYFP virus or AAV5-EF1α-DIO-ChR2-eYFP virus (UNC  
578 Vector core, 650 nl) was injected into PFC of *Dlxi12b-Cre+* mice and *Cre-negative* mice. For  
579 intersectional labeling of dHPC projecting PFC LRG neurons, CAV2-Cre virus (del Rio et al.,  
580 2019; Hnasko et al., 2006) (650 nl) was injected in the dHPC and AAV5-Dlxi12b-BG-DIO-  
581 ChR2-eYFP virus (Lee et al., 2014) (650 nl) was injected in the PFC of CD-1 mice. For  
582 retrograde labeling of dHPC projecting PFC LRG neurons, Alexa Flour 594 Cholera toxin beta  
583 subunit conjugate (CTb-594, Invitrogen; 0.5% w/v, 400–500 nl) was injected in dHPC of CD-1  
584 mice. After virus or tracer injection, the microinjector needle was left in place for 5–6 min before  
585 being removed from the brain. Mice were sutured (if receiving viral/tracer injection only) and  
586 were allowed to recover on a heated pad until ambulatory.

587

### 588 **Optic fiber implantation**

589 Following bilateral AAV5-EF1α-DIO-ChR2-eYFP virus injection in PFC, dual fiber-optic  
590 cannulas (Doric lenses; 200/240 mm, 0.22NA) were implanted in dHPC (-1.35 AP, ±0.65 ML, -  
591 1.4 DV). During these surgeries, the skull was scored with a scalpel to improve implant  
592 adhesion. We waited at least 7 weeks after surgery to allow time for viral expression.

593

### 594 **Optogenetic stimulation of PFC–dHPC LRG projections**

595 A 473 nm blue laser (OEM Laser Systems, Inc.) was coupled to the dual fiber-optic cannula  
596 (implanted in dHPC) through a dual fiber-optic patch cord (Doric Lenses, Inc.), and was  
597 controlled via a function generator (Agilent 33500B Series Waveform Generator). Laser power  
598 was adjusted such that the final light power was 3–4 mW total, summed across both fibers, and  
599 averaged over 20 Hz light pulses (5 ms duration).

600

### 601 **Behavioral assays**

602 After sufficient time for surgical recovery and viral expression, mice were handled and  
603 habituated for multiple days (3–5 days). Briefly, mice were first habituated to the behavioral  
604 testing room for 30 min prior to handling each day. For 2–3 days before starting testing, mice  
605 were habituated to the cable tethers in their home cage for 15 min. The experimenter was blinded  
606 to experimental groups during behavioral testing and scoring. A USB webcam (Logitech)  
607 connected to a computer running ANY-maze (Stoelting Co.) was used to record behavior  
608 movies. The position of mice was tracked using the built-in tracking in ANY-maze software. In  
609 some experiments, mouse positions were tracked using trained neural networks in DeepLabCut  
610 open-source software package (Mathis et al., 2018).

611

#### 612 *Novel object exploration*

613 For measuring novel object exploration, one previously unexplored object was placed in the  
614 home cage of an experimental mouse for 5 min. A blinded observer manually scored the  
615 following parameters: exploration time, bouts of exploration, and latency to the first exploration.  
616 Objects used in our study were usually lego toys, dice, small plumbing connectors, and falcon  
617 tube caps. For experimental mice with dual-fiber optic implants, two object interaction tests were  
618 performed over two days: day 1 testing was performed without light stimulation, and day 2  
619 testing was done during optogenetic stimulation of PFC–dHPC LRG projections. *Cre-negative*  
620 mice (no opsin control) with dual-fiber optic implants underwent similar behavior testing  
621 procedures.

622

#### 623 *Social interaction test*

624 For social interaction test, a novel juvenile (3–4 week old) mouse of the same sex was introduced  
625 in the home cage of an experimental mouse for 5 min. A blinded observer manually scored the  
626 time (in seconds) the experimental mouse spent with its nose in direct contact with the novel  
627 juvenile intruder. For all experimental mice, two social interaction tests were performed over two  
628 days: day 1 testing was performed without light stimulation, and day 2 testing was done during

629 optogenetic stimulation of PFC LRG projections.

630

#### 631 *Open field exploration test*

632 Mice were placed in the center of a 50 x 50 cm open-field arena and were allowed to freely  
633 explore for 12 min. The testing time was divided into four (3 min) epochs. PFC–dHPC LRG  
634 projections were optogenetically stimulated during the 2<sup>nd</sup> and 4<sup>th</sup> epochs. Distance traveled  
635 during no stimulation (light OFF) and during optogenetic stimulation (light ON) epochs was  
636 quantified using the ANY-maze tracking software.

637

#### 638 *Real-time place preference (RTPP) test*

639 Real-time place preference (RTPP) testing protocol consisted of three 20 min sessions conducted  
640 over 3 days. An apparatus with two identical chambers was used for RTPP testing. On day 1,  
641 mice were habituated to the apparatus for 15 min. On day 2, mice were placed into one randomly  
642 chosen chamber and the time spent in the two chambers was recorded. On day 3, one of the  
643 chambers was randomly assigned as the stimulated chamber. When mice entered this chamber,  
644 they received 20 Hz laser pulses (473 nm, 3–4 mW, 5 ms). The ratio of the time spent in the  
645 simulated chamber vs. the non-stimulated chamber was used as the preference index. The sides  
646 of the stimulated chambers were counterbalanced across all mice.

647

### 648 **LFP recordings: surgery and analysis**

#### 649 *Surgery*

650 Mice were anesthetized with isoflurane and placed on a stereotactic frame. After cleaning, the  
651 skull was scored with a scalpel to improve implant adhesion. For LFP recordings from wild-type  
652 CD-1 mice, tungsten electrodes (Microprobes) were inserted into the PFC (1.8 AP, -0.3 ML, -2.4  
653 DV) and dHPC (-1.35 AP, -0.65 ML, -1.5 DV). For multisite LFP recordings combined with  
654 optogenetics, one LFP electrode was implanted after AAV5-EF1 $\alpha$ -DIO-ChR2-eYFP virus  
655 injection into PFC of *Dlxi12b-Cre*<sup>+</sup> mice. A custom-made optrode (optical fiber + electrode)  
656 was implanted in dHPC to stimulate ChR2<sup>+</sup> PFC–dHPC LRG axon terminals during LFP  
657 recordings. To fabricate optrodes, a tungsten LFP recording electrode was affixed to one of the  
658 fibers of the dual-fiber optic cannula such that the tip of the electrode protruded 200–300  $\mu$ m  
659 beyond the end the optic fiber (Lee et al., 2019). Reference and ground screws were implanted  
660 above the cerebellum. Electrodes and screws were cemented to the skull with Metabond (Parkell)  
661 and connected to a headstage for multi-channel recordings (Pinnacle). Following surgery, mice  
662 were monitored postoperatively, given analgesics, and individually housed.

663

#### 664 *Recording and analysis*



665 LFP data were acquired at 2 KHz and band-pass filtered from 0.5-150Hz. Electrode placements  
666 were histologically confirmed. Analysis of LFP data was done using custom MATLAB  
667 (Mathworks) scripts. Briefly, signals were imported into MATLAB and LFP log power (for both  
668 channels) was calculated using the power spectral density output from the spectrogram function.  
669 For phase-synchrony and amplitude covariance analysis, LFPs were FIR-filtered for different  
670 frequency bands, then Hilbert transformed to yield the instantaneous amplitudes and phases. The  
671 following frequency bands were compared: theta band (4–12 Hz), beta band (15–25 Hz), low-  
672 gamma band (25–55 Hz), and high-gamma band (65–85 Hz).

673 To detect nonzero phase interdependencies (phase synchrony) between LFP signals  
674 recorded at PFC and dHPC electrodes, we estimated the weighted Phase Lag Index (wPLI)  
675 (Vinck et al., 2011) using the imaginary component of the cross-spectrum ( $S_{xy}$ ) (Equations 1.1  
676 and 1.2).  $A_x$  and  $A_y$  are instantaneous amplitudes; and  $\Phi_x$  and  $\Phi_y$  are instantaneous phases for  
677 PFC and dHPC signals, respectively.

$$678 \quad S_{xy} = A_x A_y e^{i(\phi_x - \phi_y)} \quad (1.1)$$

$$679 \quad wPLI = \frac{|\sum |imag(S_{xy})| sgn(S_{xy})|}{\sum |imag(S_{xy})|} \quad (1.2)$$

681  
682 The amplitude covariation between PFC and dHPC was calculated as the maximum normalized  
683 cross-correlation (xcorr function in MATLAB) of the instantaneous band-pass filtered  
684 amplitudes of LFP signals at each electrode. Coherence between LFP signals was computed  
685 using the mscohere function in MATLAB. Log power, wPLI, amplitude covariation, and  
686 coherence were calculated over short time intervals (at least 3 sec in duration), i.e., the intervals  
687 during which a mouse was actively exploring an object or matched intervals during baseline  
688 periods when the mouse was in its home cage.

## 689 ***Ex-vivo* slice physiology**

### 691 *Slice preparation*

692 Adult mice were anesthetized with an intraperitoneal injection of euthasol and transcardially  
693 perfused with an ice-cold cutting solution containing (in mM) 210 sucrose, 2.5 KCl, 1.25  
694  $\text{NaH}_2\text{PO}_4$ , 25  $\text{NaHCO}_3$ , 0.5  $\text{CaCl}_2$ , 7  $\text{MgCl}_2$ , 7 dextrose (bubbled with 95%  $\text{O}_2$ –5%  $\text{CO}_2$ , pH  
695 ~7.4). Mice were decapitated and the brains were removed. For acute prefrontal sections: two  
696 parallel cuts were made along the coronal plane at the rostral and caudal ends of the brains;  
697 brains were mounted on the flat surface created at the caudal end; three coronal slices (250  $\mu\text{m}$   
698 thick) were obtained using a vibrating blade microtome (VT1200S, Leica Microsystems Inc.).  
699 Dorsal hippocampal (dHPC) slices were obtained using a blocking technique described



700 previously (Malik et al., 2015). Briefly, dHPC slices were obtained by making a blocking cut at a  
701 45° angle from the coronal plane starting at the posterior end of the forebrain. A second blocking  
702 cut was made at 45° relative to the coronal plane, but starting from approximately one-third of  
703 the total length of the forebrain (from the most anterior point). Brains were mounted on the flat  
704 surface created by the first blocking cut. Approximately, 3 dorsal slices were obtained from each  
705 hemisphere.

706 Slices were allowed to recover at 34°C for 30 min followed by 30 min recovery at  
707 room temperature in a holding solution containing (in mM) 125 NaCl, 2.5 KCl, 1.25 NaH<sub>2</sub>PO<sub>4</sub>,  
708 25 NaHCO<sub>3</sub>, 2 CaCl<sub>2</sub>, 2 MgCl<sub>2</sub>, 12.5 dextrose, 1.3 ascorbic acid, 3 sodium pyruvate.

709

### 710 *Ex-vivo patch clamp recordings*

711 Somatic whole-cell current-clamp and voltage-clamp recordings were obtained as previously  
712 described (Malik and Johnston, 2017; Malik et al., 2019). Briefly, submerged slices were  
713 perfused in heated (32–34°C) artificial cerebrospinal fluid (aCSF) containing (in mM): 125  
714 NaCl, 3 KCl, 1.25 NaH<sub>2</sub> PO<sub>4</sub>, 25 NaHCO<sub>3</sub>, 2 CaCl<sub>2</sub>, 1 MgCl<sub>2</sub>, 12.5 dextrose (bubbled with 95%  
715 O<sub>2</sub>/5% CO<sub>2</sub>, pH ~7.4). Neurons were visualized using DIC optics (and eYFP fluorescence in a  
716 few experiments) fitted with a 40x water-immersion objective (BX51WI, Olympus microscope).  
717 During recordings from prefrontal slices, dHPC projecting PFC LRG neurons in all cortical  
718 layers were identified by eYFP expression. During recordings from hippocampal slices, CA1  
719 pyramidal neurons (PNs) and CA1 local inhibitory neurons (INs) were identified using laminar  
720 location (under DIC optics) and intrinsic properties of the recorded neurons.

721 Patch electrodes (2–3 MΩ) were pulled from borosilicate capillary glass of external  
722 diameter 1 mm (Sutter Instruments) using a Flaming/Brown micropipette puller (model P-2000,  
723 Sutter Instruments). For current-clamp recordings, electrodes were filled with an internal  
724 solution containing the following (in mM): 134 K-gluconate, 6 KCl, 10 HEPES, 4 NaCl, 7 K<sub>2</sub>-  
725 phosphocreatine, 0.3 Na-GTP, and 4 Mg-ATP (pH ~7.3 adjusted with KOH). Biocytin (Vector  
726 Laboratories) was included (0.1–0.2%) for subsequent histological processing of recipient CA1  
727 neurons. For voltage-clamp recordings, the internal solution contained the following (in mM):  
728 130 Cs-methanesulfonate, 10 CsCl, 10 HEPES, 4 NaCl, 7 phosphocreatine, 0.3 Na-GTP, 4 Mg-  
729 ATP, and 2 QX314-Br (pH ~7.3 adjusted with CsOH). In a few recordings, 15 μm AlexaFluor-  
730 594 (Invitrogen) was also added to the internal solution. Electrophysiology data were recorded  
731 using Multiclamp 700B amplifier (Molecular Devices). Voltages have not been corrected for  
732 measured liquid junction potential (~8 mV). Data collection was started 5–8 min after  
733 successful transition to the whole-cell configuration. Series resistance and pipette capacitance  
734 were appropriately compensated before each recording. Series resistance was usually 10–  
735 20 MΩ, and experiments were terminated if series resistances exceeded 25 MΩ.

736

737 *Data analysis*

738 *Ex-vivo* electrophysiology data were analyzed using custom routines written in IGOR Pro  
739 (Wavemetrics). Resting membrane potential (RMP) was measured in current-clamp mode  
740 immediately after reaching whole-cell configuration. Input resistance ( $R_{in}$ ) was calculated as the  
741 slope of the linear fit of the voltage-current plot generated from a family of hyperpolarizing and  
742 depolarizing current injections (-50 to +20 pA, steps of 10 pA). Firing output was calculated as  
743 the number of action potentials (APs) fired in response to 800 ms long depolarizing current  
744 injections (25–500 pA). Firing frequency was calculated as the number of APs fired per second.  
745 Firing traces in response to 50 pA current above the rheobase were used for analysis of single AP  
746 properties – AP threshold, maximum  $dV/dt$  (rate of rise of AP), AP amplitude, AP half-width,  
747 and fast afterhyperpolarization (fAHP) amplitude. AP threshold was defined as the voltage at  
748 which the value of third derivative of voltage with time is maximum. Action potential amplitude  
749 was measured from threshold to peak, and the half-width was measured at half this distance. Fast  
750 afterhyperpolarization was measured from the threshold to the negative voltage peak after the  
751 AP. Index of spike-frequency accommodation (SFA) was calculated as the ratio of the last inter-  
752 spike interval to the first inter-spike interval.

753 Recorded inhibitory neurons (INs) in PFC and dorsal CA1 were classified as fast spiking,  
754 regular spiking or irregular spiking based on electrophysiological properties. Specifically, INs  
755 were classified as fast spiking if they met 3 out of the 4 following criteria: AP half-width was <  
756 0.5 ms, firing frequency > 50 Hz, fAHP amplitude >14 mV, and SFA index < 2. Irregular  
757 spiking INs were initially visually identified based on their high variability in inter-spike interval  
758 and burst-like intermittent spiking properties. This classification was confirmed using a firing  
759 frequency threshold (<50 Hz) and/or a SFA index threshold (>2). Dorsal CA1 neurons were  
760 classified as pyramidal neurons if they satisfied the following criteria: cell body located in  
761 stratum pyramidale, AP half-width > 1 ms, fAHP amplitude < 5 mV, and maximum firing  
762 frequency < 20 Hz.

763 To measure optogenetically evoked spiking in ChR2-eYFP+ PFC INs and to measure  
764 optogenetically evoked postsynaptic currents (oPSCs) in CA1 neurons, ChR2 was stimulated  
765 using 5 ms long light pulses (maximum light power, 4 mW/mm<sup>2</sup>) generated by a Lambda DG-  
766 4 high-speed optical switch with a 300 W Xenon lamp (Sutter Instruments) and an excitation  
767 filter centered around 470 nm. Light pulses were delivered to the slice through a 40x objective  
768 (Olympus). To measure the reversal potential of oPSCs, the holding potentials were  
769 systematically varied from -100 to +20 mV in 10 mV steps. The drugs applied were 6-cyano-7-  
770 nitroquinoxaline-2,3-dione disodium salt hydrate (CNQX), 2-(3-carboxypropyl)-3-amino-6-(4-  
771 methoxyphenyl)-pyridazinium bromide (Gabazine), and d-2-amino-5-phosphonopentanoic acid

772 (D-AP5) (Tocris). Drugs were prepared as concentrated stock solutions and were diluted in  
773 ACSF on the day of the experiment.

774 To measure afferent input mediated feedforward excitation and inhibition in CA1 PNs,  
775 bipolar stimulating electrodes (Microprobes) were placed at stratum radiatum (SR) and stratum  
776 lacunosum-moleculare (SLM) to stimulate Schaffer collateral (SC) and temporo ammonic (TA)  
777 inputs, respectively. The protocol for theta-burst stimulation (TBS) consisted of bursts with five  
778 electrical stimulations (40 Hz) repeated at 5 Hz. To measure the effect of PFC LRG inputs on  
779 firing output and EPSP summation during TBS protocol, train of 470 nm light pulses (20 Hz, 5  
780 ms) was delivered through the 40x objective. Firing frequency during TBS was calculated as the  
781 average number of APs fired per burst, and summation was estimated as the area of the last  
782 EPSP in the TBS train.

783

#### 784 ***In vivo* Ca<sup>2+</sup> imaging**

##### 785 *Surgery*

786 Mice underwent two stereotactic surgeries. Cre-dependent AAV5-Syn-FLEX-ChrimsonR-  
787 tdTomato virus (Addgene) was injected in PFC (1.8 AP, ±0.3 ML, -2.4 DV) of *Dlx1/2b-Cre+*  
788 and *Cre-negative* mice. Following this, 500–550 nl of AAV9-Syn-jGCaMP7f-WPRE virus  
789 (diluted 1:2; Addgene) was injected in dorsal CA1 to express synapsin-driven calcium sensor  
790 jGCaMP7f (injection coordinates: -1.4 AP, +0.8 ML, -1.5 DV). After 3–4 weeks of viral  
791 expression, cortex overlying dorsal CA1 was slowly aspirated and a 1 mm diameter x 4 mm long  
792 integrated GRIN lens (Inscopix) was slowly advanced above the dorsal CA1 and cemented in  
793 place with Metabond dental cement. Mice were allowed to recover for at least 3 weeks before  
794 starting behavior and imaging experiments.

795

##### 796 *Combined Ca<sup>2+</sup> imaging and optogenetics*

797 Imaging data were collected using a miniaturized one-photon microscope (nVoke2; Inscopix  
798 Inc.). GCaMP7f signals (Ca<sup>2+</sup> activity) were detected using 435–460 nm excitation LED (0.1–0.2  
799 mW), and optogenetic stimulation of ChrimR expressing axons was performed using a second  
800 excitation LED centered around 590–650 nm (5 ms pulses at 20 Hz, 1–2 mW light power). Ca<sup>2+</sup>  
801 movies were acquired at 20 frames per second, spatially downsampled (4x), and were stored for  
802 offline data processing.

803 Mice were placed into a large housing cage (48 x 35 cm) for 2–3 days for 20 min where  
804 they habituated to the scope. After habituation, mice underwent a two-day behavioral testing  
805 protocol for recording NOE related Ca<sup>2+</sup> activity in CA1 neurons. On day 1, mice were allowed  
806 to explore the large home cage for 15 min (HC epoch). Following this, mice were allowed to  
807 explore a novel object introduced in the cage for 15 min (NOE epoch). On day 2, mice were

808 allowed to explore the home cage for 15 min (HC epoch) followed by optogenetic stimulation  
809 during home cage exploration for 10 min (HC + LRG stim epoch). Mice were then allowed to  
810 explore a novel object combined with optogenetic stimulation of PFC–dHPC LRG projections  
811 (NOE + LRG stim epoch). The behavior of mice during different epochs was recorded using  
812 ANY-maze software, and input TTL pulses from ANY-maze to nVoke2 acquisition software  
813 were used to synchronize  $\text{Ca}^{2+}$  imaging and mouse behavior movies.

814

#### 815 *Data analysis*

816  $\text{Ca}^{2+}$  imaging movies were preprocessed using Inscopix Data Processing Software (IDPS;  
817 Inscopix, Inc.). The video frames were spatially filtered (band-pass) with cut-offs set to 0.005  
818  $\text{pixel}^{-1}$  (low) and 0.5  $\text{pixel}^{-1}$  (high) followed by frame-by-frame motion correction for removing  
819 movement artifacts associated with respiration and head-unrestrained behavior. The mean image  
820 over the imaging session was computed, and the  $\text{dF}/\text{F}$  was computed using this mean image. The  
821 resultant preprocessed movies were then exported into MATLAB, and cell segmentation was  
822 performed using an open-source calcium imaging software (CIAPKG) (Corder et al., 2019).  
823 Specifically, we used a Principal Component Analysis/Independent Component Analysis  
824 (PCA/ICA) approach to detect and extract ROIs (presumed neurons) per field of view (Mukamel  
825 et al., 2009). For each movie, the extracted output neurons were then manually sorted to remove  
826 overlapping neurons, neurons with low SNR, and neurons with aberrant shapes.

827 Accepted neurons and their  $\text{Ca}^{2+}$  activity traces were exported to MATLAB for further  
828 analysis using custom scripts (as previously described in (Frost et al., 2020)). Briefly, we  
829 calculated the standard deviation ( $\sigma$ ) of the  $\text{Ca}^{2+}$  movie and used this to perform threshold-based  
830 event detection on the traces by first detecting increases in  $\text{dF}/\text{F}$  exceeding  $2\sigma$  (over one second).  
831 Subsequently, we detected events that exceeded  $10\sigma$  for over two seconds and had a total area  
832 under the curve higher than  $150\sigma$ . The peak of the event was estimated as the local maximum of  
833 the entire event. For an extracted output neuron, active frames were marked as the period from  
834 the beginning of an event until the  $\text{Ca}^{2+}$  signal decreased 30% from the peak of the event (up to a  
835 maximum of 2 seconds).

836

#### 837 *Procedure for measuring object-related changes in $\text{Ca}^{2+}$ activity*

838 Frame-by-frame x-y positions of the head of a mouse in the testing cage were detected using  
839 DeepLabCut. A small rectangular area surrounding the object location in the testing cage was  
840 marked as the object zone. Time points (frames acquired at 30 Hz and resampled at 20 Hz, using  
841 resample function in MATLAB) when the mouse's head was inside the object zone were  
842 classified as INbin and the remaining frames were classified as OUTbin. We then recorded the  
843 frame-by-frame  $\text{Ca}^{2+}$  activity of neurons corresponding to the INbin and OUTbin position

844 frames. For all extracted neurons, the mean activity for INbin ( $\mu_{INbin}$ ) and OUTbin ( $\mu_{OUTbin}$ )  
845 frames were calculated. We also calculated the standard deviation ( $SD_{OUTbin}$ ) of neuronal activity  
846 in OUTbin frames. The z-scored activity of each neuron was estimated using equation 2.1. The  
847 object signal-to-noise ratio (Object SNR) was calculated using the z-scored activity during HC  
848 and NOE epochs (Equation 2.2).

$$849 \quad zscore = \frac{\mu_{INbin} - \mu_{OUTbin}}{SD_{OUTbin}} \quad (2.1)$$

$$850 \quad Object\ SNR = zscore_{NOE} - Zscore_{HC} \quad (2.2)$$

851

## 852 **Histological processing**

### 853 *Assessment of virus expression and anterograde tracing of LRG projections*

854 Animals were transcardially perfused with PBS, and then with 4% paraformaldehyde (PFA). The  
855 brains were post-fixed for at least one day in PFA solution. Coronal sections (50–75  $\mu$ m thick)  
856 were obtained using a vibratome. Sections that included the injection sites, electrode  
857 implantation sites and lens implantation sites were mounted on slides and cover-slipped using a  
858 glycerol-base, aqueous mounting medium (Vectashield Plus Antifade Mounting Medium, Vector  
859 labs). Sections were first scanned using an upright wide-field fluorescence microscope.  
860 Following this, confocal images were taken with 10x and 20x objectives on an Andor Borealis  
861 CSU-W1 spinning disk confocal mounted on a Nikon Ti Microscope (UCSF Nikon Imaging  
862 Center, NIH S10 Shared Instrumentation grant 1S10OD017993-01A1) and captured with an  
863 Andor Zyla sCMOS camera and Micro-Manager software (Open Imaging).

864

### 865 *Inhibitory neuron marker expression in recipient CA1 neurons*

866 Slices containing biocytin-filled cells were fixed overnight in a buffered solution containing 4%  
867 PFA. Slices were rinsed in PBS, then blocked and permeabilized in PBS with 5% Donkey  
868 Serum, 0.3% Triton X-100 and 1% BSA. Slices were immuno-stained overnight with one or two  
869 primary antibodies: rabbit anti-PV (Swant; diluted 1:200), rat anti-SST (Millipore, diluted  
870 1:200), or rabbit anti-VIP (Immunostar, diluted 1:200). Slices were washed 6 x 10min in PBS  
871 containing 0.3% Triton X-100. Slices were incubated with donkey anti-rabbit Alexa-488, donkey  
872 anti-rat Alexa 594 secondary antibody (1:800, Thermo Fisher), and Streptavidin-647 (1:300,  
873 Thermo Fisher) overnight at 4°C. After washing 6 x 10min in PBS with 0.3% Triton X-100,  
874 slices were mounted with an aqueous mounting medium. Confocal mages were obtained as  
875 described above.

876

### 877 *Inhibitory neuron (IN) marker expression in CTb tagged PFC LRG neurons*

878 5-7 days after CTb injection, mice were transcardially perfused with PBS followed by 4% PFA

879 solution, and brains were post-fixed for at least one day. Coronal sections (75  $\mu$ m) were obtained  
880 using a vibratome, and immunohistochemistry was performed (as described above). The following  
881 primary antibodies were used to stain for IN markers: rabbit anti-PV (Swant; diluted 1:200); rat  
882 anti-SST (Millipore, diluted 1:200); rabbit anti-VIP (Immunostar, diluted 1:200); rabbit anti-  
883 NPY (Immunostar, diluted 1:500); rabbit anti-calretinin (Immunostar, diluted 1:500); rabbit anti-  
884 nNOS (Life technologies, diluted 1:500), and goat anti-CTb (List, diluted 1:500). The following  
885 secondary antibodies were used: donkey anti-rabbit Alexa 488; donkey anti-rat Alexa 488; and  
886 donkey anti-goat Alexa 594. For each IN marker, confocal images collected from mounted  
887 sections were used to manually count the number of CTb+ and IN marker+ PFC neurons (ImageJ  
888 software).

889

### 890 **Statistical analysis**

891 Detailed statistical analyses were performed using MATLAB and Graphpad Prism. Comparisons  
892 of means were performed using paired or unpaired two-tailed Student's t test, one-way ANOVA  
893 or two-way repeated measures ANOVA with Tukey post hoc test unless otherwise stated. For  
894 non-parametric data sets, we used a Chi-square test to determine significance. Sample sizes and  
895 statistical tests and parameters are listed in the figure legends. Data are reported as mean  $\pm$   
896 S.E.M. unless otherwise stated.

897

### 898 **Data availability**

899 Data supporting the findings of this study are available from the corresponding author upon  
900 reasonable request.

901

### 902 **Code availability**

903 Custom code used in this study is available from the corresponding author upon reasonable  
904 request.



## SUPPLEMENTAL INFORMATION: FIGURES AND LEGENDS

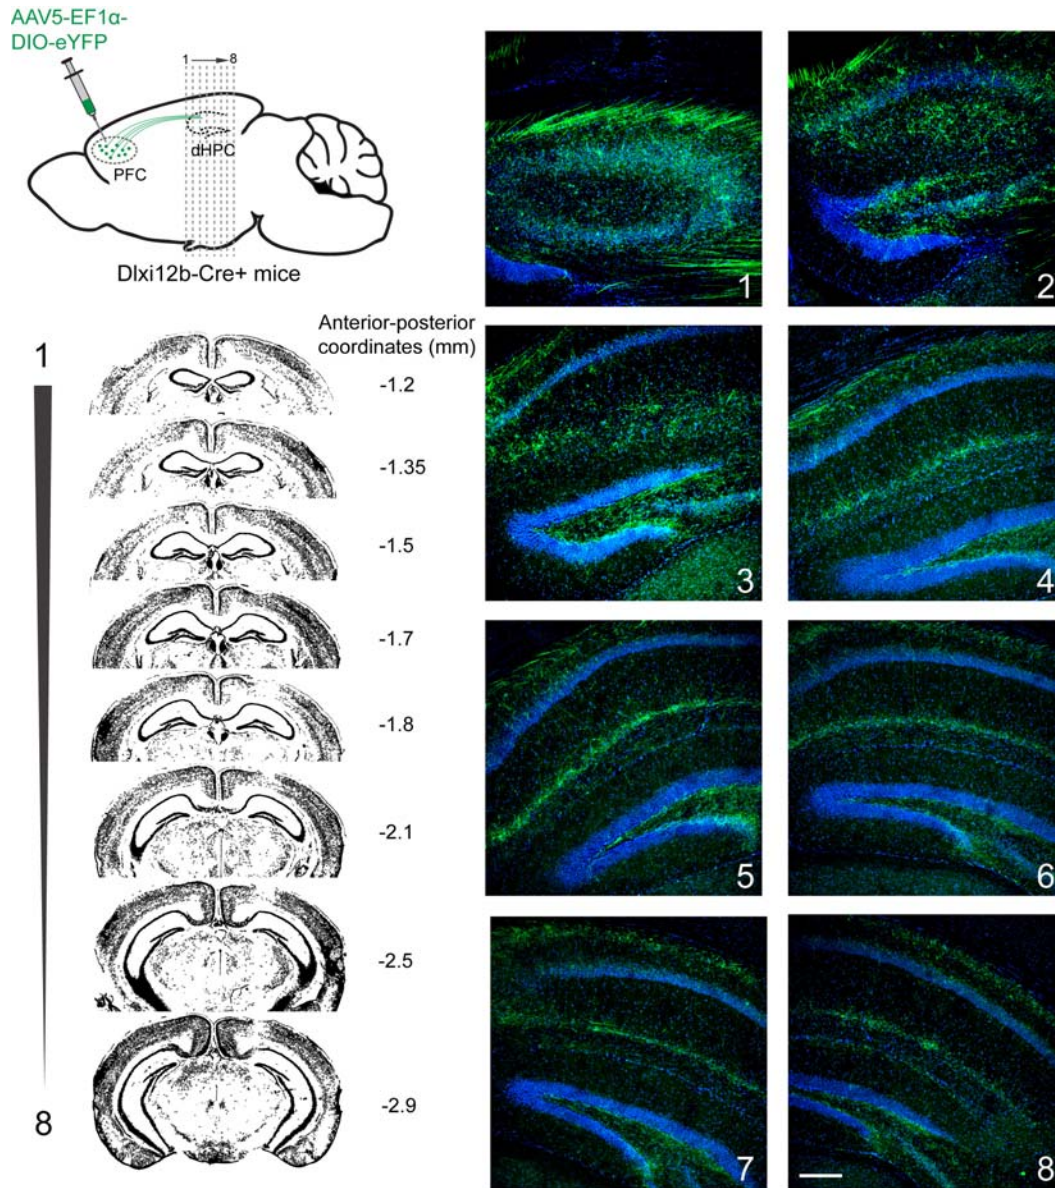

905 **Figure S1, related to Figure 1: Anterograde tracing of HPC projecting PFC LRG neurons.**  
906 Left: Schematic illustrating the anterograde tracing strategy. Microinjection of Cre-dependent  
907 eYFP virus into the PFC of *Dlx12b-Cre+* mice. Coronal slices of the hippocampus were  
908 obtained at increasing anterior-posterior (AP) distance from Bregma. Right: DAPI stained  
909 hippocampal sections showing eYFP+ PFC LRG axon terminals (green). Numbers on the right  
910 indicate the anterior-posterior (AP) coordinates w.r.t. bregma. Scale bar, 200  $\mu$ m.



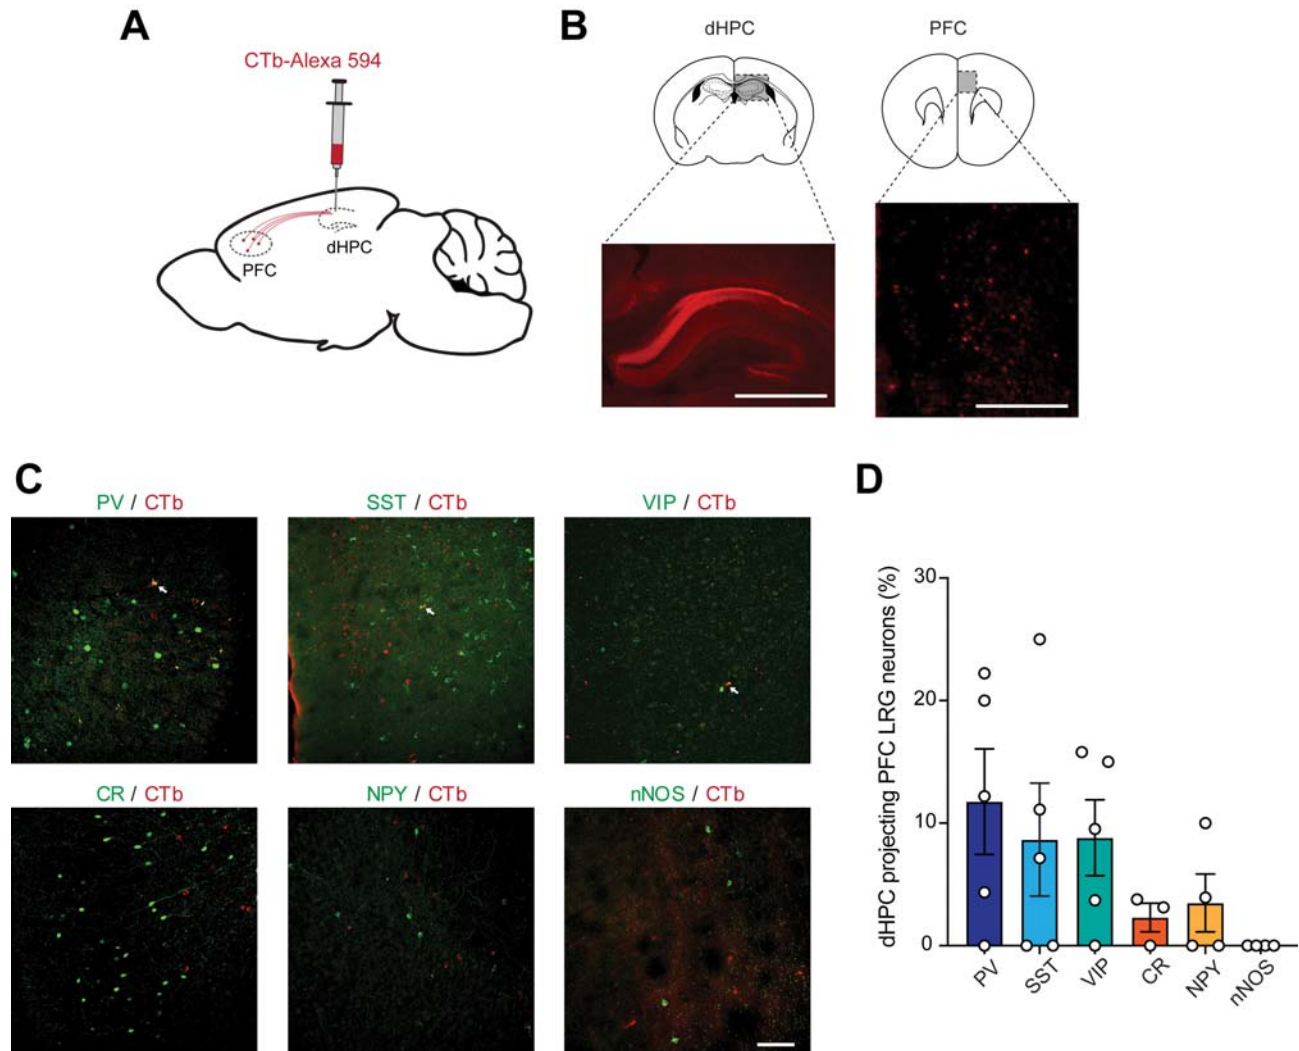

911 **Figure S2, related to Figure 1: Inhibitory neuron marker expression in dHPC projecting**  
912 **PFC LRG neurons.**

913 (A) Schematic illustrating the experimental design: Retrograde tracer, Alexa 594 conjugated  
914 Cholera Toxin (CTb), was injected into dHPC.

915 (B) Representative images showing Alexa 594-CTb injection site in dHPC section (left) and  
916 CTb+ neurons in PFC (right). Note: there is a high density of labeled axons in the corpus  
917 callosum. Scale bar, 1mm (left) and 250 $\mu$ m (right).

918 (C) Example images showing co-labeling of inhibitory neuron markers (green) in CTb+ dHPC-  
919 projecting PFC LRG neurons. Parvalbumin (PV), Somatostatin (SST), Vasoactive intestinal  
920 polypeptide (VIP), Calretinin (CR), Neuropeptide Y (NPY), neuronal nitric oxide synthase  
921 (nNOS). Scale bar, 100  $\mu$ m.

922 (D) Percentage CTb+ dHPC projecting PFC LRG neurons co-expressing various inhibitory  
923 neuron markers (mean  $\pm$  SEM). Empty circles represent values from individual sections.

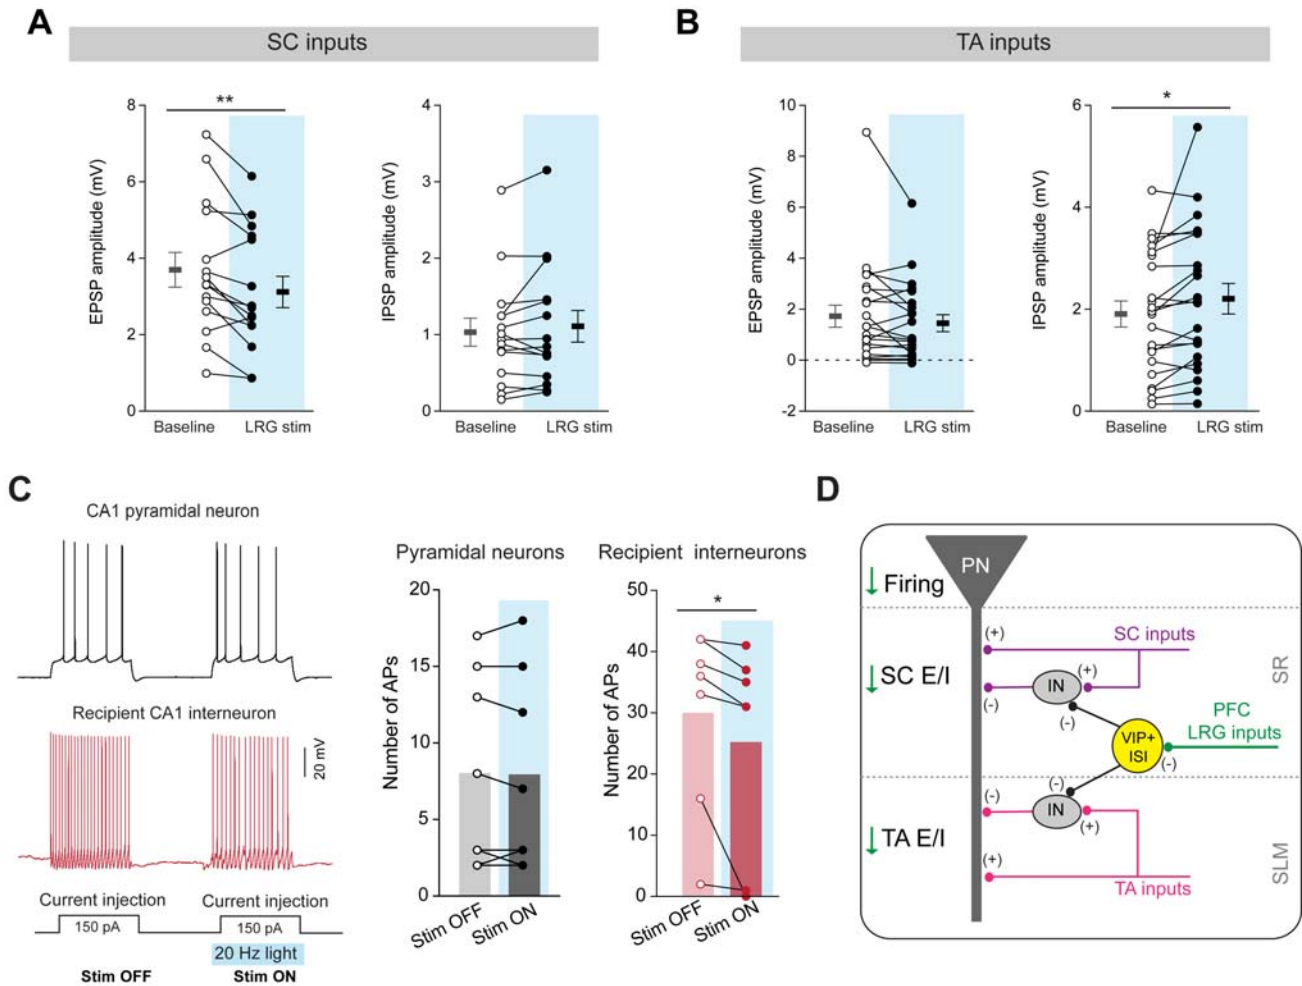

924 **Figure S3, related to Figure 2: Dorsal HPC projecting PFC LRG neurons increase afferent**  
 925 **input mediated feedforward inhibition in the CA1 microcircuit.**

926 (A) Amplitudes of SC (Schaffer collateral) pathway mediated EPSPs (left) and IPSPs (right)  
 927 recorded in CA1 pyramidal neurons with (LRG stim) and without (Baseline) concomitant  
 928 optogenetic stimulation of PFC LRG projections. Open and filled circles represent individual  
 929 neurons ( $n = 15$ ), horizontal lines represent averages ( $\pm$  SEM). Paired two-way t-test, \*\*  $p <$   
 930 0.01.

931 (B) Same as A for TA (temporoammonic) input pathway mediated EPSPs and IPSPs ( $n = 22$ ).  
 932 Paired two-way t-test, \*  $p < 0.05$ .

933 (C) Left: example voltage traces showing firing in response to depolarizing current injections  
 934 with (Stim ON) and without (Stim OFF) concomitant optogenetic stimulation of PFC-dHPC  
 935 LRG projections (470 nm, 5 ms pulses at 20 Hz; blue bar). Black trace is an example voltage  
 936 response in CA1 pyramidal neuron. Red trace shows example voltage response in recipient CA1  
 937 interneuron. Right: firing output in the absence of optogenetic stimulation (Stim OFF) and during

938 concomitant optogenetic stimulation (Stim ON) in CA1 pyramidal neurons (n = 10) and recipient  
939 CA1 interneurons (n = 7). Open and filled circles represent individual neurons, bars represent  
940 the average values. Two-way paired t-test; \* p < 0.05.

941 (E) Schematic illustrating the effects of PFC–dHPC LRG projection activation on microcircuit  
942 computation in dorsal CA1. PFC LRG projections inhibit VIP+ disinhibitory interneurons, and  
943 thereby increase SC and TA pathway mediated feedforward inhibition onto CA1 pyramidal  
944 neurons. The reduction in excitation-inhibition ratio at the afferent inputs reduces the afferent  
945 input mediated firing of CA1 pyramidal neurons.

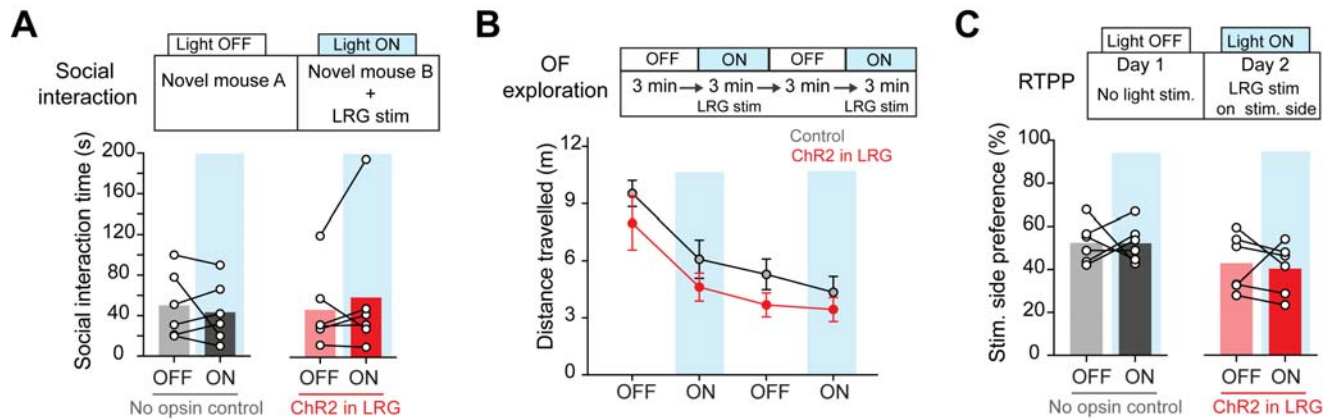

946 **Figure S4 related to Figure 3: Optogenetic stimulation of PFC–dHPC LRG projections**  
 947 **during social and exploratory behaviors.**

948 **(A)** Top: mice were tested for social interaction behavior with and without optogenetic  
 949 stimulation. Bottom: Time spent interacting with a novel juvenile mouse is plotted for control  
 950 and ChR2-expressing mice during light OFF and light ON periods. Open circles represent data  
 951 from individual mice and bars represent the average values.

952 **(B)** Top: During open-field (OF) exploration, PFC–dHPC LRG projections were optogenetically  
 953 stimulated during the second and fourth 3-min epochs of the testing session. Bottom: Average ( $\pm$   
 954 SEM) distance travelled during OF exploration during light ON and light OFF epochs is plotted  
 955 for control and ChR2-expressing mice.

956 **(C)** Top: experimental design for real-time place preference (RTPP) test. Bottom: Preference for  
 957 the stimulated chamber during light OFF and light ON conditions (expressed as a % of the total  
 958 time) is plotted for control and ChR2-expressing mice. Open circles represent data from  
 959 individual mice and bars represent the average values.

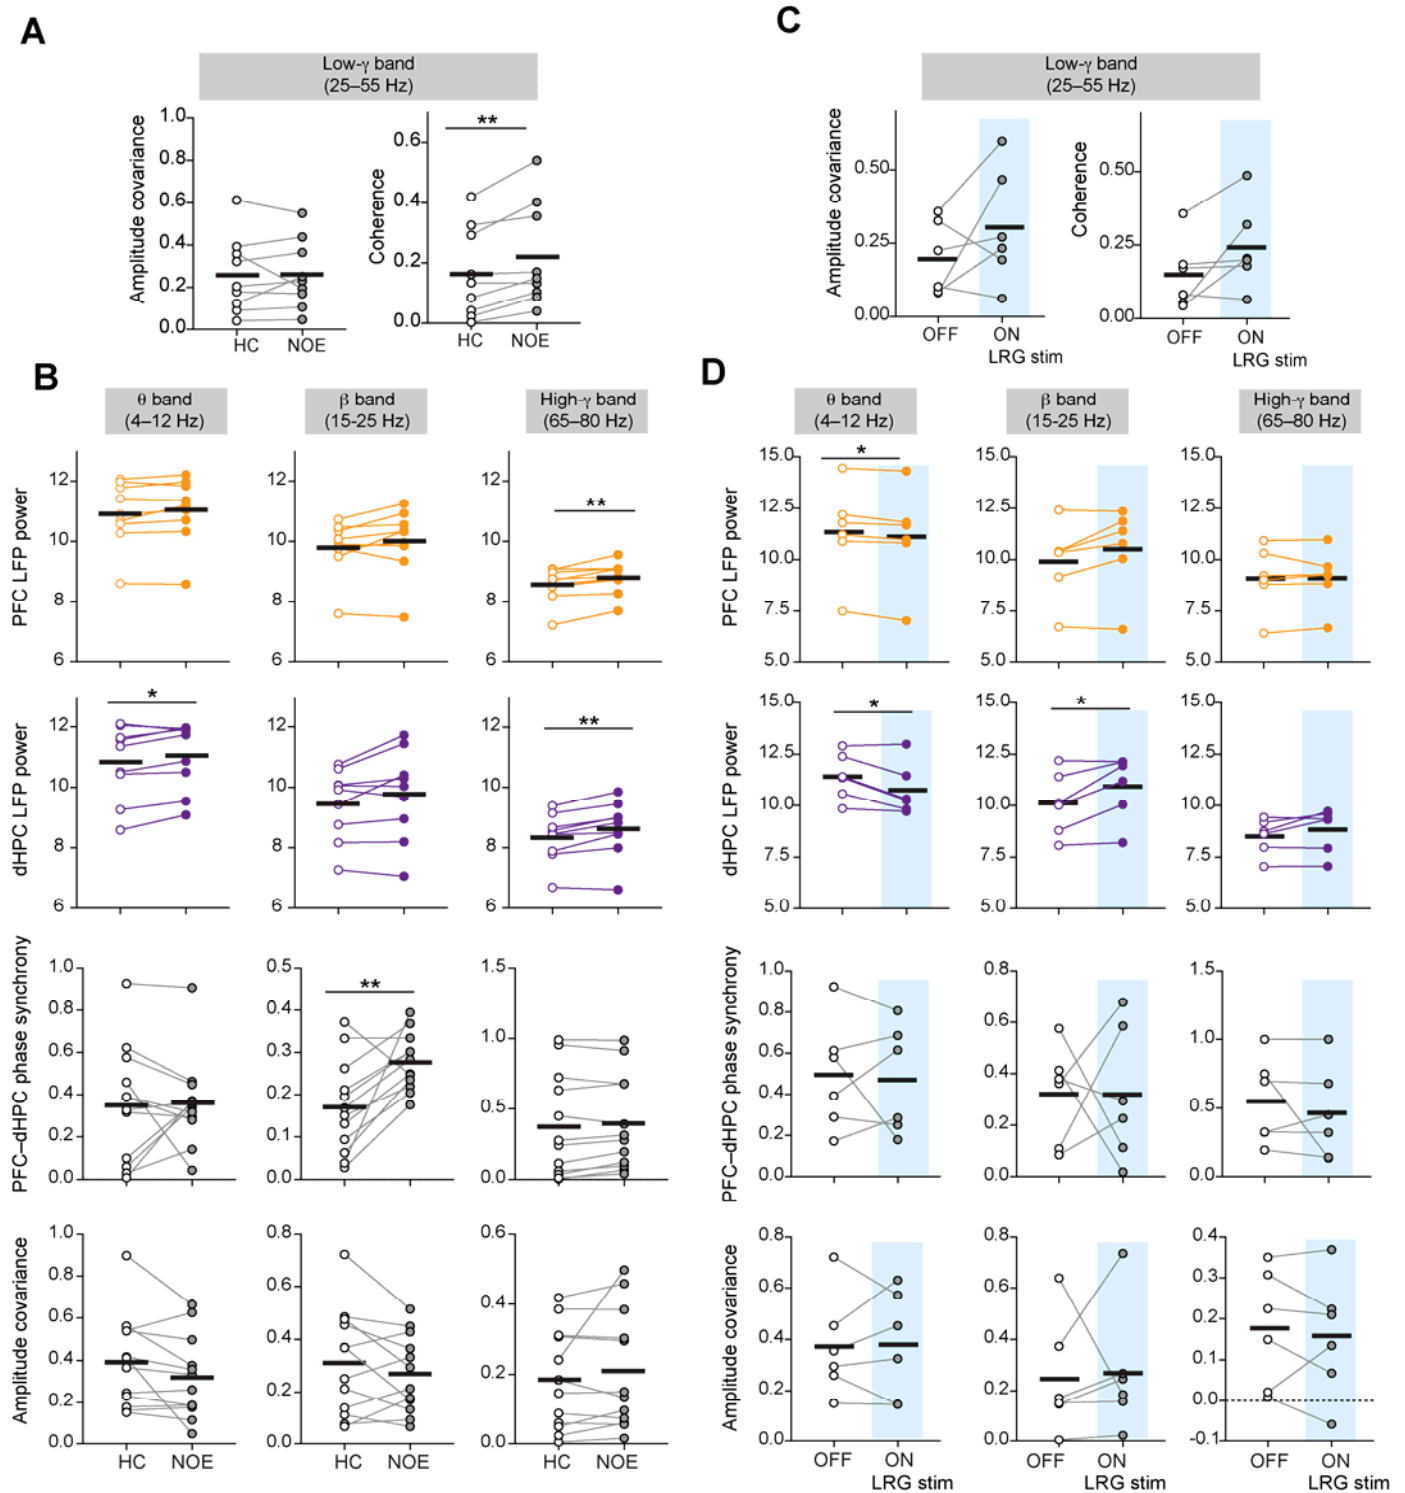

960 **Figure S5 related to Figure 4: Effect of optogenetic stimulation of PFC-dHPC LRG**  
 961 **projections and NOE on oscillatory activity in dHPC and PFC.**

962 (A) Low-gamma (low- $\gamma$ ) amplitude covariance and coherence between PFC and dHPC LFPs  
 963 recorded during home cage exploration (HC) and novel object exploration (NOE) epochs. Open

964 and filled circles represent data from individual mice ( $n = 9$ ) and solid black lines represent  
965 average values. Two-way paired t-test,  $** p < 0.01$ .

966 **(B)** PFC and dHPC LFP log power, PFC-dHPC phase synchrony, and PFC-dHPC amplitude  
967 covariance for the theta ( $\theta$ ), beta ( $\beta$ ) and high gamma (high- $\gamma$ ) frequency bands during HC and  
968 NOE epochs are plotted. Open and filled circles represent data from individual mice ( $n = 9$ ) and  
969 solid black lines represent average values. Two-way paired t-test;  $* p < 0.05$ ,  $**p < 0.01$ .

970 **(C)** Low- $\gamma$  amplitude covariance and coherence between PFC and dHPC LFPs recorded during  
971 Light OFF and Light ON epochs (optogenetic stimulation; 473 nm, 5 ms pulses at 20 Hz; blue  
972 bars). Open and filled circles represent data from individual mice ( $n = 6$ ) and solid black lines  
973 represent average values.

974 **(D)** PFC and dHPC LFP log power, PFC-dHPC phase synchrony, and PFC-dHPC amplitude  
975 covariance for the theta ( $\theta$ ), beta ( $\beta$ ) and high-gamma (high- $\gamma$ ) frequency bands during Light  
976 OFF and Light ON epochs are plotted. Open and filled circles represent data from individual  
977 mice ( $n = 6$ ) and solid black lines represent average values. Two-way paired t-test;  $* p < 0.05$ .



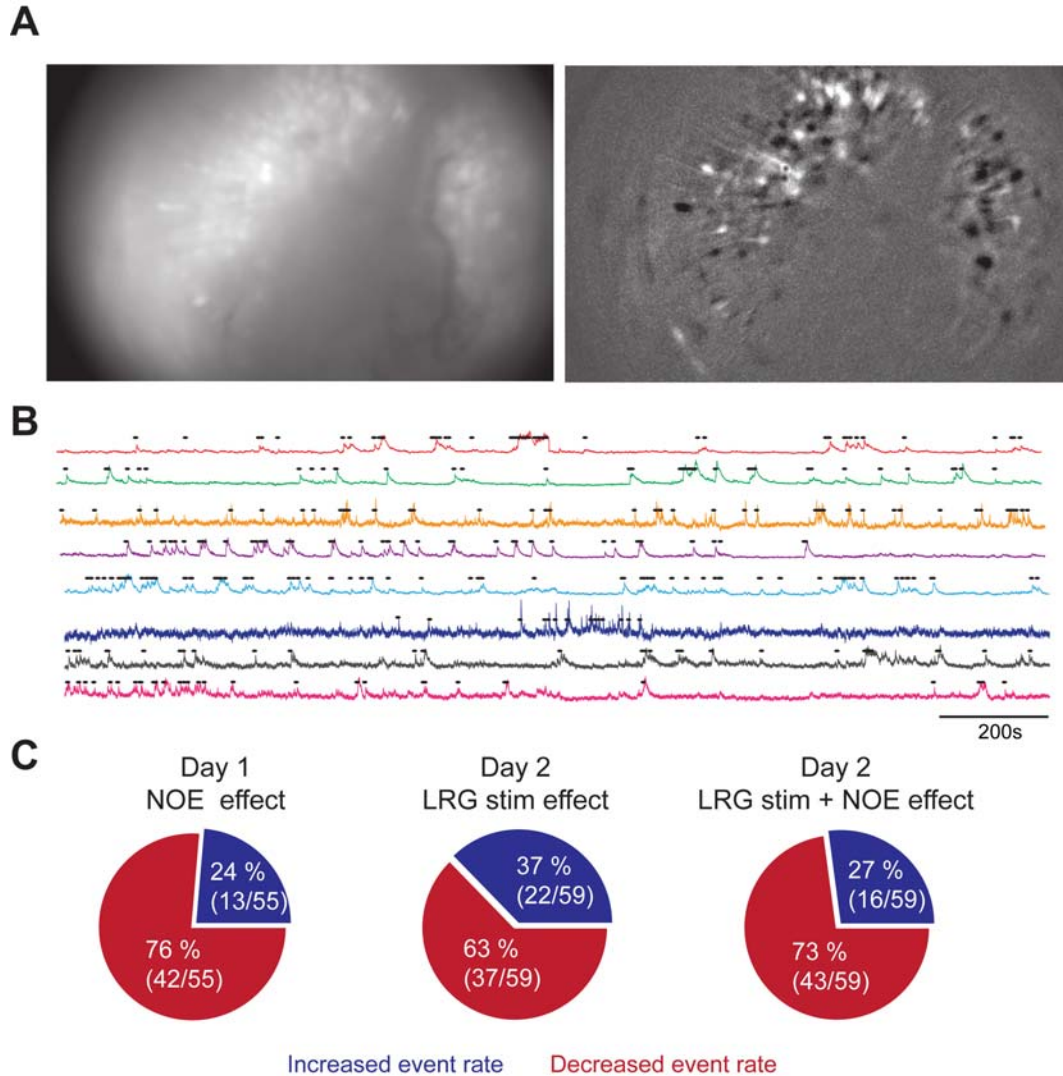

978 **Figure S6, related to Figure 5: *In vivo* Ca<sup>2+</sup> activity of dorsal CA1 neurons during**  
979 **optogenetic stimulation of PFC LRG projections.**

980 (A) Left: Representative raw epifluorescence image showing jRCaMP7f expression in the dorsal  
981 CA1 imaged using a miniaturized microscope in a freely behaving mouse. Right: Transformed  
982 image showing relative change in fluorescence (dF/F).

983 (B) Representative Ca<sup>2+</sup> transients (colored lines) recorded from dorsal CA1 neurons. Black dots  
984 above the traces represent the detected active Ca<sup>2+</sup> events.

985 (C) Pie charts showing the fraction of CA1 neurons that decrease or increase activity during  
986 NOE on day 1 testing, during LRG stimulation on day 2 testing, or during NOE in the presence  
987 of LRG stimulation on day 2 testing.



## SUPPLEMENTAL INFORMATION: TABLES

988 **Table S1, related to Figure 1: Electrophysiological heterogeneity of dHPC projecting PFC**  
 989 **LRG neurons.**

990 Mean ( $\pm$  SEM) values for resting membrane properties, action-potential (AP) properties, and  
 991 firing properties of dHPC projecting PFC LRG neurons classified as regular spiking, fast  
 992 spiking, and irregular spiking (Fig. 1H). AHP, afterhyperpolarization; SFA, spike frequency  
 993 accommodation.

| Electrophysiological property   | Regular spiking<br>n = 9 | Fast spiking<br>n = 4 | Irregular spiking<br>n = 3 |
|---------------------------------|--------------------------|-----------------------|----------------------------|
| Resting membrane potential (mV) | $-71 \pm 1.1$            | $-65.5 \pm 2.7$       | $-67.6 \pm 1.6$            |
| Input Resistance (M $\Omega$ )  | $256.2 \pm 25.4$         | $171 \pm 47.2$        | $383.3 \pm 75.3$           |
| Membrane time constant (ms)     | $15.1 \pm 2.3$           | $11.3 \pm 2.1$        | $20.9 \pm 4.6$             |
| Sag ratio                       | $1.01 \pm 0.07$          | $1.03 \pm 0.02$       | $1.05 \pm 0.05$            |
| Rebound slope (mV)              | $-0.04 \pm 0.01$         | $-0.04 \pm 0.02$      | $-0.4 \pm 0.41$            |
| Rheobase (pA)                   | $113.8 \pm 18.6$         | $162.5 \pm 54.5$      | $50 \pm 25$                |
| AP amplitude (mV)               | $75.3 \pm 4.4$           | $86.5 \pm 4$          | $93 \pm 2.2$               |
| AP rate of rise (mV/s)          | $308.2 \pm 32.2$         | $468.4 \pm 67.4$      | $316.8 \pm 51.9$           |
| AP threshold (mV)               | $-41.6 \pm 1$            | $-50.6 \pm 1.7$       | $-47.7 \pm 1.2$            |
| AP half-width (ms)              | $0.74 \pm 0.07$          | $0.37 \pm 0.04$       | $0.84 \pm 0.19$            |
| Fast AHP (mV)                   | $13.7 \pm 0.3$           | $19.1 \pm 0.4$        | $13.5 \pm 1.2$             |
| SFA index                       | $2.5 \pm 0.2$            | $1.5 \pm 0.1$         | $5.4 \pm 0.5$              |
| Max. firing frequency (Hz)      | $46 \pm 4.8$             | $117.9 \pm 11.5$      | $16.8 \pm 1.53$            |

994 **Table S2, related to Figure 2: Electrophysiological properties of dHPC interneurons receiving**  
 995 **direct PFC LRG inputs.**

996 Mean ( $\pm$  SEM) values for resting membrane properties, action-potential (AP) properties, firing  
 997 properties, and optogenetically evoked postsynaptic current (oPSC) amplitudes recorded from recipient  
 998 CA1 interneurons classified as regular spiking, fast spiking, and irregular spiking (Fig. 2B).

999 AHP, afterhyperpolarization; SFA, spike frequency accommodation.

| <b>Electrophysiological property</b> | <b>Regular spiking</b><br>n = 25 | <b>Fast spiking</b><br>n = 11 | <b>Irregular spiking</b><br>n = 19 |
|--------------------------------------|----------------------------------|-------------------------------|------------------------------------|
| Resting membrane potential (mV)      | -65 $\pm$ 2.1                    | -68.3 $\pm$ 1.3               | -66.8 $\pm$ 1.2                    |
| Input Resistance (M $\Omega$ )       | 218.2 $\pm$ 18.2                 | 248.2 $\pm$ 27.2              | 235.4 $\pm$ 21.9                   |
| Rheobase (pA)                        | 105 $\pm$ 15.3                   | 77.2 $\pm$ 30.2               | 100 $\pm$ 15.6                     |
| AP amplitude (mV)                    | 84.2 $\pm$ 2.7                   | 83.1 $\pm$ 2.8                | 85.5 $\pm$ 2.07                    |
| AP rate of rise (mV/s)               | 386.9 $\pm$ 20.9                 | 376.5 $\pm$ 25.9              | 358 $\pm$ 17.1                     |
| AP threshold (mV)                    | -46.1 $\pm$ 0.8                  | -47.5 $\pm$ 1.4               | -46.9 $\pm$ 1                      |
| AP half-width (ms)                   | 0.58 $\pm$ 0.03                  | 0.43 $\pm$ 0.03               | 0.54 $\pm$ 0.02                    |
| Fast AHP (mV)                        | 10.1 $\pm$ 1                     | 16.3 $\pm$ 1.35               | 13.5 $\pm$ 0.9                     |
| SFA index                            | 3.5 $\pm$ 0.3                    | 2.2 $\pm$ 0.26                | 5.9 $\pm$ 0.7                      |
| Max. firing frequency (Hz)           | 53.7 $\pm$ 2.44                  | 127.5 $\pm$ 8.1               | 50.4 $\pm$ 8.5                     |
| oPSC amplitude (pA)                  | 324.3 $\pm$ 53.2                 | 193.4 $\pm$ 47.3              | 172.3 $\pm$ 25.3                   |

## REFERENCES

- 1000 Acsády, L., Arabadzisz, D., and Freund, T.F. (1996a). Correlated morphological and neurochemical  
1001 features identify different subsets of vasoactive intestinal polypeptide-immunoreactive interneurons in  
1002 rat hippocampus. *Neuroscience* 73, 299–315.
- 1003 Acsády, L., Görcs, T.J., and Freund, T.F. (1996b). Different populations of vasoactive intestinal  
1004 polypeptide-immunoreactive interneurons are specialized to control pyramidal cells or interneurons in  
1005 the hippocampus. *Neuroscience* 73, 317–334.
- 1006 Ang, C.W., Carlson, G.C., and Coulter, D.A. (2005). Hippocampal CA1 Circuitry Dynamically Gates  
1007 Direct Cortical Inputs Preferentially at Theta Frequencies. *J Neurosci* 25, 9567–9580.
- 1008 Basu, J., Zaremba, J.D., Cheung, S.K., Hitti, F.L., Zemelman, B.V., Losonczy, A., and Siegelbaum, S.A.  
1009 (2016). Gating of hippocampal activity, plasticity, and memory by entorhinal cortex long-range  
1010 inhibition. *Science* 351, aaa5694–aaa5694.
- 1011 Bähner, F., Demanuele, C., Schweiger, J., Gerchen, M.F., Zamoscik, V., Ueltzhöffer, K., Hahn, T.,  
1012 Meyer, P., Flor, H., Durstewitz, D., et al. (2015). Hippocampal-dorsolateral prefrontal coupling as a  
1013 species-conserved cognitive mechanism: a human translational imaging study.  
1014 *Neuropsychopharmacology* 40, 1674–1681.
- 1015 Bittner, K.C., Grienberger, C., Vaidya, S.P., Milstein, A.D., Macklin, J.J., Suh, J., Tonegawa, S., and  
1016 Magee, J.C. (2015). Conjunctive input processing drives feature selectivity in hippocampal CA1  
1017 neurons. *Nat Neurosci* 18, 1133–1142.
- 1018 Brincat, S.L., and Miller, E.K. (2015). Frequency-specific hippocampal-prefrontal interactions during  
1019 associative learning. *Nat Neurosci* 18, 576–581.
- 1020 Chamberland, S., and Topolnik, L. (2012). Inhibitory control of hippocampal inhibitory neurons. *Front.*  
1021 *Neurosci.* 6, 165.
- 1022 Chattopadhyaya, B., and Cristo, G.D. (2012). GABAergic circuit dysfunctions in neurodevelopmental  
1023 disorders. *Front Psychiatry* 3, 51–51.
- 1024 Christenson Wick, Z., Tetzlaff, M.R., and Krook-Magnuson, E. (2019). Novel long-range inhibitory  
1025 nNOS-expressing hippocampal cells. *eLife* 8, e46816.
- 1026 Churchwell, J.C., Morris, A.M., Musso, N.D., and Kesner, R.P. (2010). Prefrontal and hippocampal  
1027 contributions to encoding and retrieval of spatial memory. *Neurobiology of Learning and Memory* 93,  
1028 415–421.
- 1029 Colgin, L.L. (2011). Oscillations and hippocampal–prefrontal synchrony. *Current Opinion in*  
1030 *Neurobiology* 21, 467–474.
- 1031 Corder, G., Ahanonu, B., Grewe, B.F., Wang, D., Schnitzer, M.J., and Scherrer, G. (2019). An  
1032 amygdalar neural ensemble that encodes the unpleasantness of pain. *Science* 363, 276.
- 1033 Csicsvari, J., Jamieson, B., Wise, K.D., and Buzsáki, G. (2003). Mechanisms of Gamma Oscillations in  
1034 the Hippocampus of the Behaving Rat. *Neuron* 37, 311–322.

- 1035 Cunha-Reis, D., and Caulino-Rocha, A. (2020). VIP Modulation of Hippocampal Synaptic Plasticity: A  
1036 Role for VIP Receptors as Therapeutic Targets in Cognitive Decline and Mesial Temporal Lobe  
1037 Epilepsy. *Front Cell Neurosci* *14*, 153–153.
- 1038 Cunniff, M.M., Markenscoff-Papadimitriou, E., Ostrowski, J., Rubenstein, J.L., and Sohal, V.S. (2020).  
1039 Altered hippocampal-prefrontal communication during anxiety-related avoidance in mice deficient for  
1040 the autism-associated gene *Pogz*. *eLife* *9*, e54835.
- 1041 Dana, H., Sun, Y., Mohar, B., Hulse, B.K., Kerlin, A.M., Hasseman, J.P., Tsegaye, G., Tsang, A.,  
1042 Wong, A., Patel, R., et al. (2019). High-performance calcium sensors for imaging activity in neuronal  
1043 populations and microcompartments. *Nat Meth* *16*, 649–657.
- 1044 del Rio, D., Beucher, B., Lavigne, M., Wehbi, A., Gonzalez Dopeso-Reyes, I., Saggio, I., and Kremer,  
1045 E.J. (2019). CAV-2 Vector Development and Gene Transfer in the Central and Peripheral Nervous  
1046 Systems. *Front. Mol. Neurosci.* *12*, 1202.
- 1047 DeVito, L.M., and Eichenbaum, H. (2010). Distinct contributions of the hippocampus and medial  
1048 prefrontal cortex to the “what-where-when” components of episodic-like memory in mice. *Behav Brain*  
1049 *Res* *215*, 318–325.
- 1050 Eichenbaum, H. (2017). Prefrontal–hippocampal interactions in episodic memory. *Nat Rev Neurosci* *18*,  
1051 547–558.
- 1052 Fanselow, M.S., and Dong, H.-W. (2010). Are the Dorsal and Ventral Hippocampus Functionally  
1053 Distinct Structures? *Neuron* *65*, 7–19.
- 1054 Floresco, S.B., Seamans, J.K., and Phillips, A.G. (1997). Selective Roles for Hippocampal, Prefrontal  
1055 Cortical, and Ventral Striatal Circuits in Radial-Arm Maze Tasks With or Without a Delay. *J Neurosci*  
1056 *17*, 1880.
- 1057 Francavilla, R., Vilette, V., Luo, X., Chamberland, S., Muñoz-Pino, E., Camiré, O., Wagner, K., Kis,  
1058 V., Somogyi, P., and Topolnik, L. (2018). Connectivity and network state-dependent recruitment of  
1059 long-range VIP-GABAergic neurons in the mouse hippocampus. *Nature Communications* *9*, 5043.
- 1060 Frost, N.A., Haggart, A., and Sohal, V.S. (2020). Dynamic correlations help prefrontal ensembles  
1061 transmit information about social behavior. *bioRxiv* 2020.08.05.238741.
- 1062 Gazzaley, A., and D'Esposito, M. (2007). Unifying prefrontal cortex function: Executive control, neural  
1063 networks, and top-down modulation. In *The Human Frontal Lobes: Functions and Disorders*, 2nd Ed,  
1064 (New York, NY, US: The Guilford Press), pp. 187–206.
- 1065 Gilbert, S.J., Bird, G., Brindley, R., Frith, C.D., and Burgess, P.W. (2008). Atypical recruitment of  
1066 medial prefrontal cortex in autism spectrum disorders: An fMRI study of two executive function tasks.  
1067 *Neuropsychologia* *46*, 2281–2291.
- 1068 Godsil, B.P., Kiss, J.P., Spedding, M., and Jay, T.M. (2013). The hippocampal-prefrontal pathway: the  
1069 weak link in psychiatric disorders? *European Neuropsychopharmacology* *23*, 1165–1181.
- 1070 Grienberger, C., Milstein, A.D., Bittner, K.C., Romani, S., and Magee, J.C. (2017). Inhibitory  
1071 suppression of heterogeneously tuned excitation enhances spatial coding in CA1 place cells. *Nat*  
1072 *Neurosci* *20*, 417–426.

- 1073 Guise, K.G., and Shapiro, M.L. (2017). Medial Prefrontal Cortex Reduces Memory Interference by  
1074 Modifying Hippocampal Encoding. *Neuron* *94*, 183–192.e188.
- 1075 Hallock, H.L., Wang, A., and Griffin, A.L. (2016). Ventral Midline Thalamus Is Critical for  
1076 Hippocampal-Prefrontal Synchrony and Spatial Working Memory. *J. Neurosci* *36*, 8372–8389.
- 1077 Hare, B.D., and Duman, R.S. (2020). Prefrontal cortex circuits in depression and anxiety: contribution of  
1078 discrete neuronal populations and target regions. *Molecular Psychiatry* *2014* *20*:7 *25*, 2742–2758.
- 1079 Hnasko, T.S., Perez, F.A., Scouras, A.D., Stoll, E.A., Gale, S.D., Luquet, S., Phillips, P.E.M., Kremer,  
1080 E.J., and Palmiter, R.D. (2006). Cre recombinase-mediated restoration of nigrostriatal dopamine in  
1081 dopamine-deficient mice reverses hypophagia and bradykinesia. *Proc Natl Acad Sci USA* *103*, 8858.
- 1082 Hoover, W.B., and Vertes, R.P. (2007). Anatomical analysis of afferent projections to the medial  
1083 prefrontal cortex in the rat. *Brain Struct Funct* *212*, 149–179.
- 1084 Hoover, W.B., and Vertes, R.P. (2012). Collateral projections from nucleus reuniens of thalamus to  
1085 hippocampus and medial prefrontal cortex in the rat: a single and double retrograde fluorescent labeling  
1086 study. *Brain Struct Funct* *217*, 191–209.
- 1087 Jay, T.R.S.M., and Witter, M.P. (1991). Distribution of hippocampal CA1 and subicular efferents in the  
1088 prefrontal cortex of the rat studied by means of anterograde transport ofPhaseolus vulgaris-  
1089 leucoagglutinin. *J. Comp. Neurol.* *313*, 574–586.
- 1090 Jin, J., and Maren, S. (2015). Prefrontal-Hippocampal Interactions in Memory and Emotion. *Front. Syst.*  
1091 *Neurosci.* *9*, 1082.
- 1092 Jinno, S., Klausberger, T., Marton, L.F., Dalezios, Y., Roberts, J.D.B., Fuentealba, P., Bushong, E.A.,  
1093 Henze, D., Buzsaki, G., and Somogyi, P. (2007). Neuronal Diversity in GABAergic Long-Range  
1094 Projections from the Hippocampus. *J. Neurosci* *27*, 8790–8804.
- 1095 Jones, M.W., and Wilson, M.A. (2005). Theta Rhythms Coordinate Hippocampal–Prefrontal  
1096 Interactions in a Spatial Memory Task. *PLoS Biol* *3*, e402.
- 1097 Klapoetke, N.C., Murata, Y., Kim, S.S., Pulver, S.R., Birdsey-Benson, A., Cho, Y.K., Morimoto, T.K.,  
1098 Chuong, A.S., Carpenter, E.J., Tian, Z., et al. (2014). Independent optical excitation of distinct neural  
1099 populations. *Nat Meth* *11*, 338–346.
- 1100 Kupferschmidt, D.A., and Gordon, J.A. (2018). The dynamics of disordered dialogue: Prefrontal,  
1101 hippocampal and thalamic miscommunication underlying working memory deficits in schizophrenia.  
1102 *Brain and Neuroscience Advances* *2*, 239821281877182.
- 1103 Kyd, R.J., and Bilkey, D.K. (2003). Prefrontal Cortex Lesions Modify the Spatial Properties of  
1104 Hippocampal Place Cells. *Cerebral Cortex* *13*, 444–451.
- 1105 Lee, A.T., Cunniff, M.M., See, J.Z., Wilke, S.A., Luongo, F.J., Ellwood, I.T., Ponnayolu, S., and Sohal,  
1106 V.S. (2019). VIP Interneurons Contribute to Avoidance Behavior by Regulating Information Flow  
1107 across Hippocampal-Prefrontal Networks. *Neuron* *102*, 1223–1234.e1224.

- 1108 Lee, A.T., Vogt, D., Rubenstein, J.L., and Sohal, V.S. (2014). A Class of GABAergic Neurons in the  
1109 Prefrontal Cortex Sends Long-Range Projections to the Nucleus Accumbens and Elicits Acute  
1110 Avoidance Behavior. *J Neurosci* *34*, 11519–11525.
- 1111 Li, M., Long, C., and Yang, L. (2015). Hippocampal-Prefrontal Circuit and Disrupted Functional  
1112 Connectivity in Psychiatric and Neurodegenerative Disorders. *BioMed Research International* *2015*,  
1113 810548–810548.
- 1114 Malik, R., and Johnston, D. (2017). Dendritic GIRK Channels Gate the Integration Window, Plateau  
1115 Potentials, and Induction of Synaptic Plasticity in Dorsal But Not Ventral CA1 Neurons. *J Neurosci* *37*,  
1116 3940.
- 1117 Malik, R., Dougherty, K.A., Parikh, K., Byrne, C., and Johnston, D. (2015). Mapping the  
1118 electrophysiological and morphological properties of CA1 pyramidal neurons along the longitudinal  
1119 hippocampal axis. *Hippocampus* *26*, 341–361.
- 1120 Malik, R., Pai, E.L.-L., Rubin, A.N., Stafford, A.M., Angara, K., Minasi, P., Rubenstein, J.L., Sohal,  
1121 V.S., and Vogt, D. (2019). *Tsc1* represses parvalbumin expression and fast-spiking properties in  
1122 somatostatin lineage cortical interneurons. *Nature Communications* *10*, 4994.
- 1123 Marin, O. (2012). Interneuron dysfunction in psychiatric disorders. *Nat Rev Neurosci* *13*, 107–120.
- 1124 Mathis, A., Mamidanna, P., Cury, K.M., Abe, T., Murthy, V.N., Mathis, M.W., and Bethge, M. (2018).  
1125 DeepLabCut: markerless pose estimation of user-defined body parts with deep learning. *Nat Neurosci*  
1126 *21*, 1281–1289.
- 1127 McKenzie, S. (2018). Inhibition shapes the organization of hippocampal representations. *Hippocampus*  
1128 *28*, 659–671.
- 1129 Melzer, S., and Monyer, H. (2020). Diversity and function of corticopetal and corticofugal GABAergic  
1130 projection neurons. *Nat Rev Neurosci* *21*, 499–515.
- 1131 Melzer, S., Michael, M., Caputi, A., Eliava, M., Fuchs, E.C., Whittington, M.A., and Monyer, H. (2012).  
1132 Long-range-projecting GABAergic neurons modulate inhibition in hippocampus and entorhinal cortex.  
1133 *Science* *335*, 1506–1510.
- 1134 Miller, E.K., and Cohen, J.D. (2001). An integrative theory of prefrontal cortex function. *Annu. Rev.*  
1135 *Neurosci.* *24*, 167–202.
- 1136 Miller, E.K. (2000). The prefrontal cortex and cognitive control. *Nat Rev Neurosci* *1*, 59–65.
- 1137 Milstein, A.D., Bloss, E.B., Apostolides, P.F., Vaidya, S.P., Dilly, G.A., Zemelman, B.V., and Magee,  
1138 J.C. (2015). Inhibitory Gating of Input Comparison in the CA1 Microcircuit. *Neuron* *87*, 1274–1289.
- 1139 Moser, E.I., Kropff, E., and Moser, M.-B. (2008). Place Cells, Grid Cells, and the Brain's Spatial  
1140 Representation System. *Annu. Rev. Neurosci.* *31*, 69–89.
- 1141 Mukamel, E.A., Nimmerjahn, A., and Schnitzer, M.J. (2009). Automated analysis of cellular signals  
1142 from large-scale calcium imaging data. *Neuron* *63*, 747–760.



- 1143 O'Keefe, J. (1976). Place units in the hippocampus of the freely moving rat. *Experimental Neurology* *51*,  
1144 78–109.
- 1145 O'Neill, P.K., Gordon, J.A., and Sigurdsson, T. (2013). Theta Oscillations in the Medial Prefrontal  
1146 Cortex Are Modulated by Spatial Working Memory and Synchronize with the Hippocampus through Its  
1147 Ventral Subregion. *J. Neurosci* *33*, 14211–14224.
- 1148 Orellana, G., and Slachevsky, A. (2013). Executive Functioning in Schizophrenia. *Front Psychiatry* *4*,  
1149 35.
- 1150 Paterno, R., Casalia, M., and Baraban, S.C. (2020). Interneuron deficits in neurodevelopmental  
1151 disorders: Implications for disease pathology and interneuron-based therapies. *European Journal of*  
1152 *Paediatric Neurology* *24*, 81–88.
- 1153 Place, R., Farovik, A., Brockmann, M., and Eichenbaum, H. (2016). Bidirectional prefrontal-  
1154 hippocampal interactions support context-guided memory. *Nat Neurosci* *19*, 992–994.
- 1155 Potter, G.B., Petryniak, M.A., Shevchenko, E., McKinsey, G.L., Ekker, M., and Rubenstein, J.L.R.  
1156 (2009). Generation of Cre-transgenic mice using *Dlx1/Dlx2* enhancers and their characterization in  
1157 GABAergic interneurons. *40*, 167–186.
- 1158 Preston, A.R., and Eichenbaum, H. (2013). Interplay of hippocampus and prefrontal cortex in memory.  
1159 *Current Biology* *23*, R764–R773.
- 1160 Rajasethupathy, P., Sankaran, S., Marshel, J.H., Kim, C.K., Ferenczi, E., Lee, S.Y., Berndt, A.,  
1161 Ramakrishnan, C., Jaffe, A., Lo, M., et al. (2015). Projections from neocortex mediate top-down control  
1162 of memory retrieval. *Nature* *526*, 653–659.
- 1163 Shin, J.D., and Jadhav, S.P. (2016). Multiple modes of hippocampal–prefrontal interactions in memory-  
1164 guided behavior. *Systems Neuroscience* *40*, 161–169.
- 1165 Sigurdsson, T., and Duvarci, S. (2016). Hippocampal-Prefrontal Interactions in Cognition, Behavior and  
1166 Psychiatric Disease. *Front. Syst. Neurosci.* *9*, 190–190.
- 1167 Sigurdsson, T., Stark, K.L., Karayiorgou, M., Gogos, J.A., and Gordon, J.A. (2010). Impaired  
1168 hippocampal–prefrontal synchrony in a genetic mouse model of schizophrenia. *Nature* *464*, 763–767.
- 1169 Spellman, T., Rigotti, M., Ahmari, S.E., Fusi, S., Gogos, J.A., and Gordon, J.A. (2015). Hippocampal-  
1170 prefrontal input supports spatial encoding in working memory. *Nature* *522*, 309–314.
- 1171 Stamatakis, A.M., Schachter, M.J., Gulati, S., Zitelli, K.T., Malanowski, S., Tajik, A., Fritz, C., Trulson,  
1172 M., and Otte, S.L. (2018). Simultaneous Optogenetics and Cellular Resolution Calcium Imaging During  
1173 Active Behavior Using a Miniaturized Microscope. *Front. Neurosci.* *12*, 496–496.
- 1174 Tamamaki, N., and Tomioka, R. (2010). Long-Range GABAergic Connections Distributed throughout  
1175 the Neocortex and their Possible Function. *Front. Neurosci.* *4*, 202.
- 1176 Trimper, J.B., Galloway, C.R., Jones, A.C., Mandi, K., and Manns, J.R. (2017). Gamma Oscillations in  
1177 Rat Hippocampal Subregions Dentate Gyrus, CA3, CA1, and Subiculum Underlie Associative Memory  
1178 Encoding. *CellReports* *21*, 2419–2432.



- 1179 Tukker, J.J., Fuentealba, P., Hartwich, K., Somogyi, P., and Klausberger, T. (2007). Cell Type-Specific  
1180 Tuning of Hippocampal Interneuron Firing during Gamma Oscillations *In Vivo*. *J Neurosci* 27, 8184.
- 1181 Turi, G.F., Li, W.-K., Chavlis, S., Pandi, I., O'Hare, J., Priestley, J.B., Grosmark, A.D., Liao, Z., Ladow,  
1182 M., Zhang, J.F., et al. (2019). Vasoactive Intestinal Polypeptide-Expressing Interneurons in the  
1183 Hippocampus Support Goal-Oriented Spatial Learning. *Neuron* 101, 1150–1165.e1158.
- 1184 Vertes, R.P., Hoover, W.B., Szigeti-Buck, K., and Leranth, C. (2007). Nucleus reuniens of the midline  
1185 thalamus: Link between the medial prefrontal cortex and the hippocampus. *Brain Research Bulletin* 71,  
1186 601–609.
- 1187 Vinck, M., Oostenveld, R., van Wingerden, M., Battaglia, F., and Pennartz, C.M.A. (2011). An  
1188 improved index of phase-synchronization for electrophysiological data in the presence of volume-  
1189 conduction, noise and sample-size bias. *Neuroimage* 55, 1548–1565.
- 1190 Wang, G.-W., and Cai, J.-X. (2006). Disconnection of the hippocampal–prefrontal cortical circuits  
1191 impairs spatial working memory performance in rats. *Behavioural Brain Research* 175, 329–336.
- 1192 Wilson, M.A., and McNaughton, B.L. (1993). Dynamics of the hippocampal ensemble code for space.  
1193 *Science* 261, 1055.
- 1194 Xu, W., and Südhof, T.C. (2013). A neural circuit for memory specificity and generalization. *Science*  
1195 339, 1290–1295.
- 1196 Yoon, T., Okada, J., Jung, M.W., and Kim, J.J. (2008). Prefrontal cortex and hippocampus subserve  
1197 different components of working memory in rats. *Learn. Mem.* 15, 97–105.
- 1198 Yu, J.Y., and Frank, L.M. (2015). Hippocampal–cortical interaction in decision making. *Neurobiology*  
1199 *of Learning and Memory* 117, 34–41.
- 1200
